# Supplementary material
Source: PubMed Central journal article supplement (PMC5818814)
Supplement: jama-318-1136-s001.pdf [file jama-318-1136-s001.pdf]

## Supplementary Online Content

Dwyer-Lindgren L, Bertozzi-Villa A, Stubbs RW, et al. Trends and patterns of differences in chronic respiratory disease mortality among US counties, 1980-2014. *JAMA*. doi:10.1001/jama.2017.11747

**eFigure 1.** County-level mortality from chronic respiratory diseases.

**eFigure 2.** County-level mortality from chronic obstructive pulmonary disease among men.

**eFigure 3.** County-level mortality from chronic obstructive pulmonary disease among women.

**eFigure 4.** County-level mortality from other pneumoconiosis.

**eTable 1.** Data sources used for covariates.

**eTable 2.** Counties combined to ensure historically stable units of analysis.

**eTable 3.** GBD cause list and associated ICD9 and ICD10 codes.

This supplementary material has been provided by the authors to give readers additional information about their work.

[A]

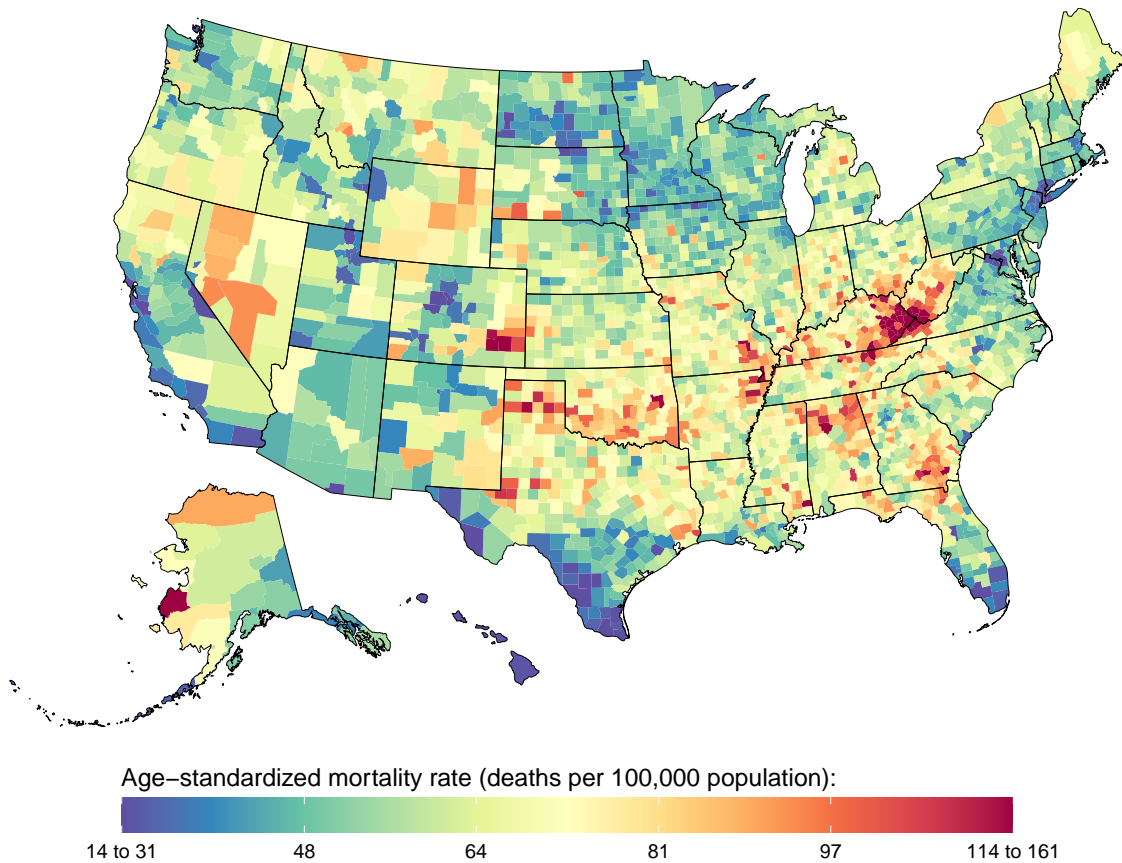

[B]

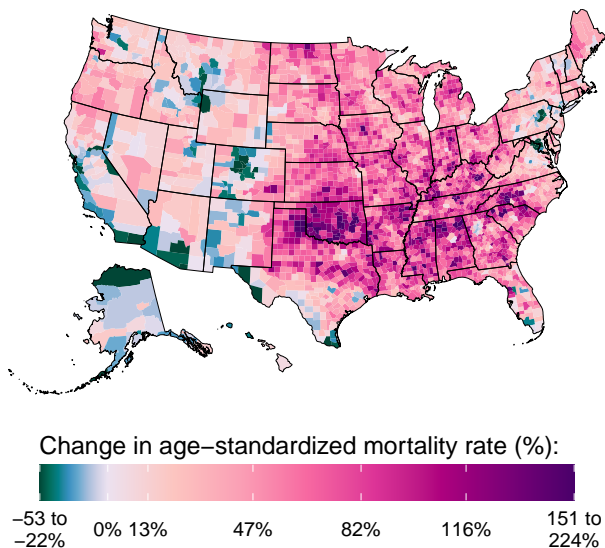

[C]

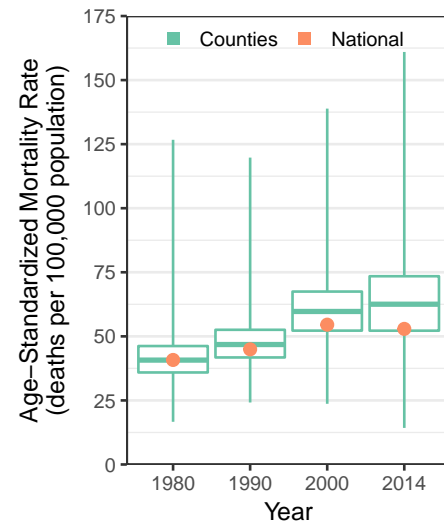

**eFigure 1: County-level mortality from chronic respiratory diseases.** [A] Age-standardized mortality rate for both sexes combined in 2014; [B] Relative change in the age-standardized mortality rate for both sexes combined between 1980 and 2014; [C] Age-standardized mortality rate in 1980, 1990, 2000, and 2014. In panels [A] and [B], the color scale is truncated at approximately the 1st and 99th percentile as indicated by the range given in the color scale. In panel [C], the boxes indicate the 25th, 50th, and 75th percentile across all counties while the lines indicate the full range across counties and the dots indicate the national-level rate.

[A]

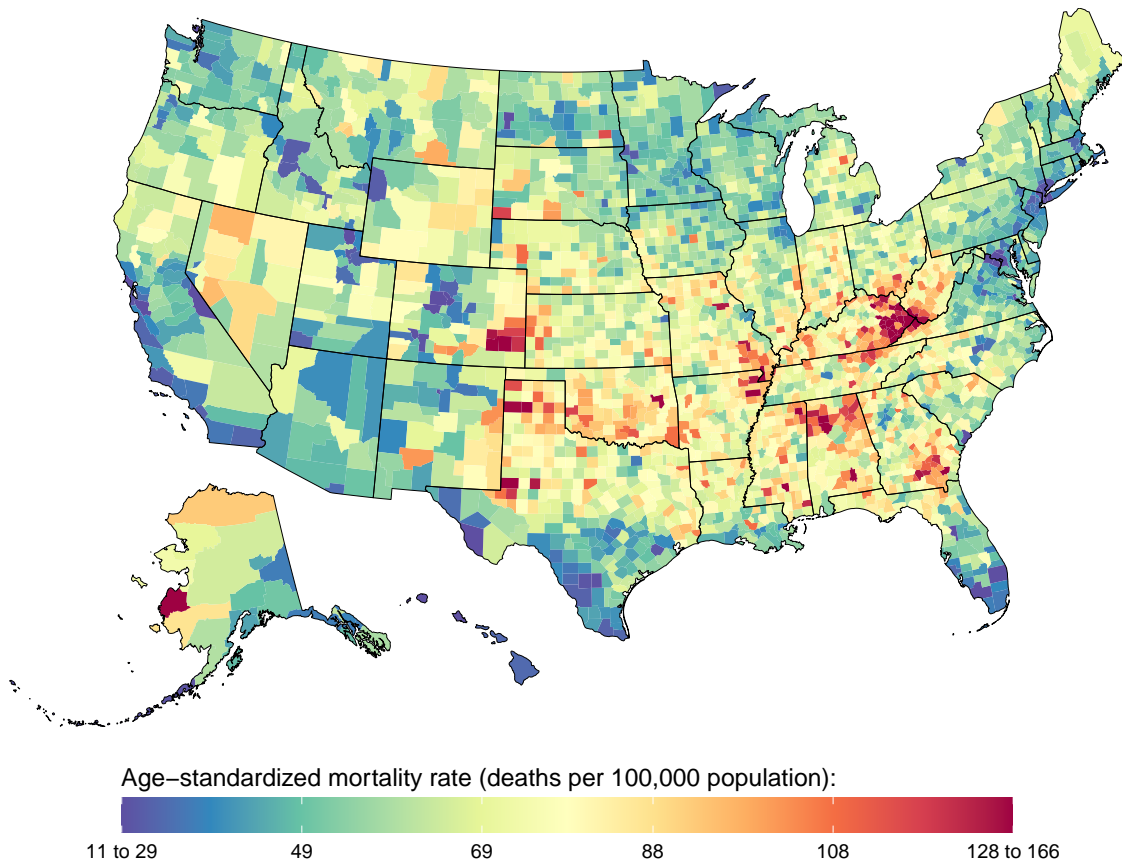

[B]

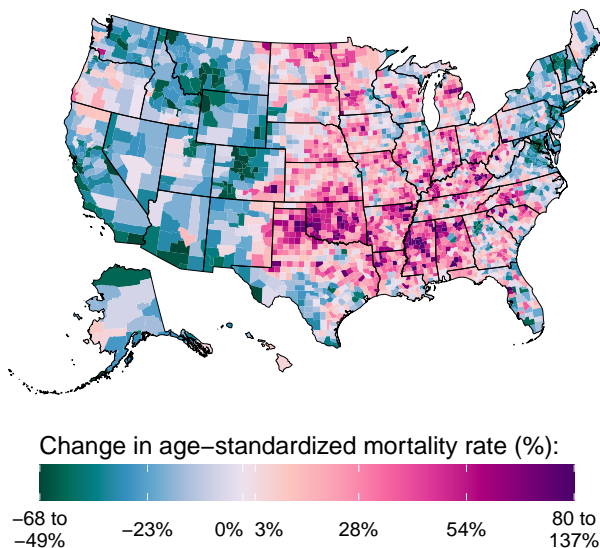

[C]

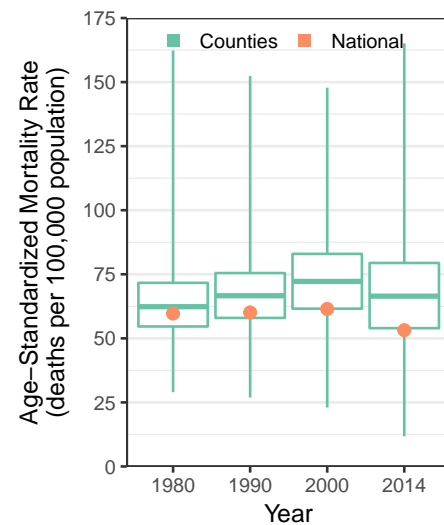

**eFigure 2: County-level mortality from chronic obstructive pulmonary disease among men.** [A] Age-standardized mortality rate for males in 2014; [B] Relative change in the age-standardized mortality rate for males between 1980 and 2014; [C] Age-standardized mortality rate in 1980, 1990, 2000, and 2014. In panels [A] and [B], the color scale is truncated at approximately the 1st and 99th percentile as indicated by the range given in the color scale. In panel [C], the boxes indicate the 25th, 50th, and 75th percentile across all counties while the lines indicate the full range across counties and the dots indicate the national-level rate.

[A]

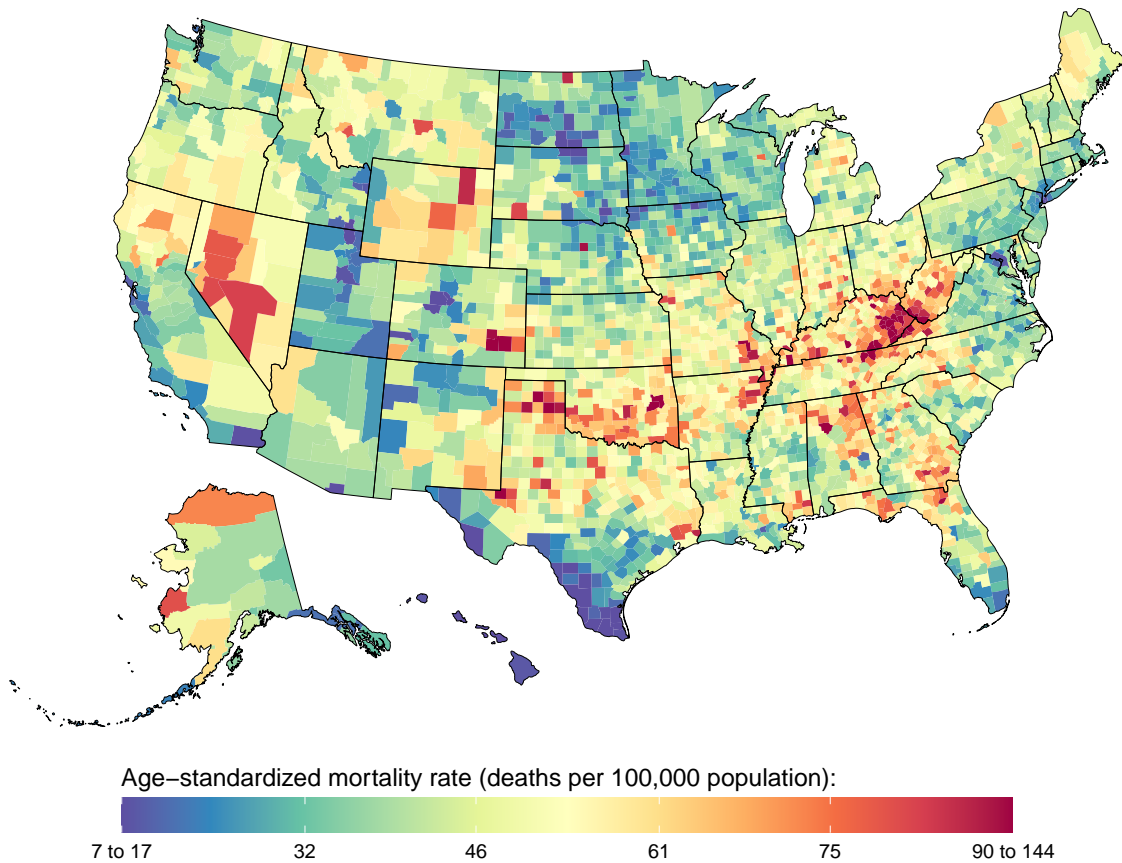

[B]

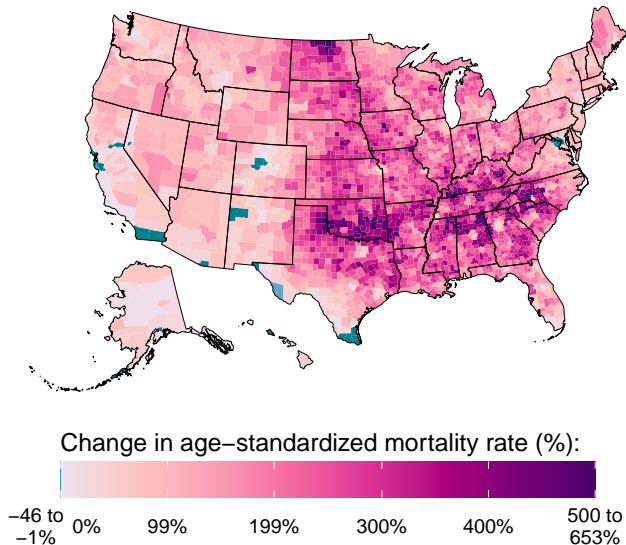

[C]

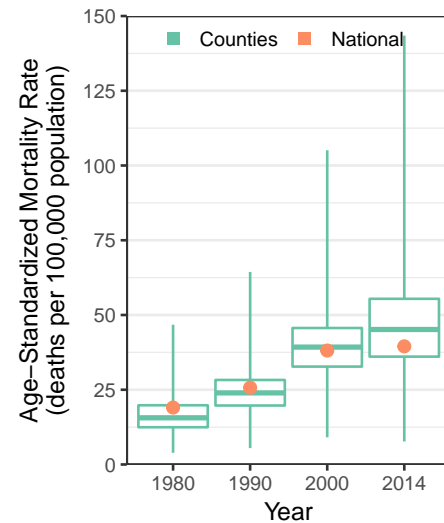

**eFigure 3: County-level mortality from chronic obstructive pulmonary disease among women.**

[A] Age-standardized mortality rate for females in 2014; [B] Relative change in the age-standardized mortality rate for females between 1980 and 2014; [C] Age-standardized mortality rate in 1980, 1990, 2000, and 2014. In panels [A] and [B], the color scale is truncated at approximately the 1st and 99th percentile as indicated by the range given in the color scale. In panel [C], the boxes indicate the 25th, 50th, and 75th percentile across all counties while the lines indicate the full range across counties and the dots indicate the national-level rate.

[A]

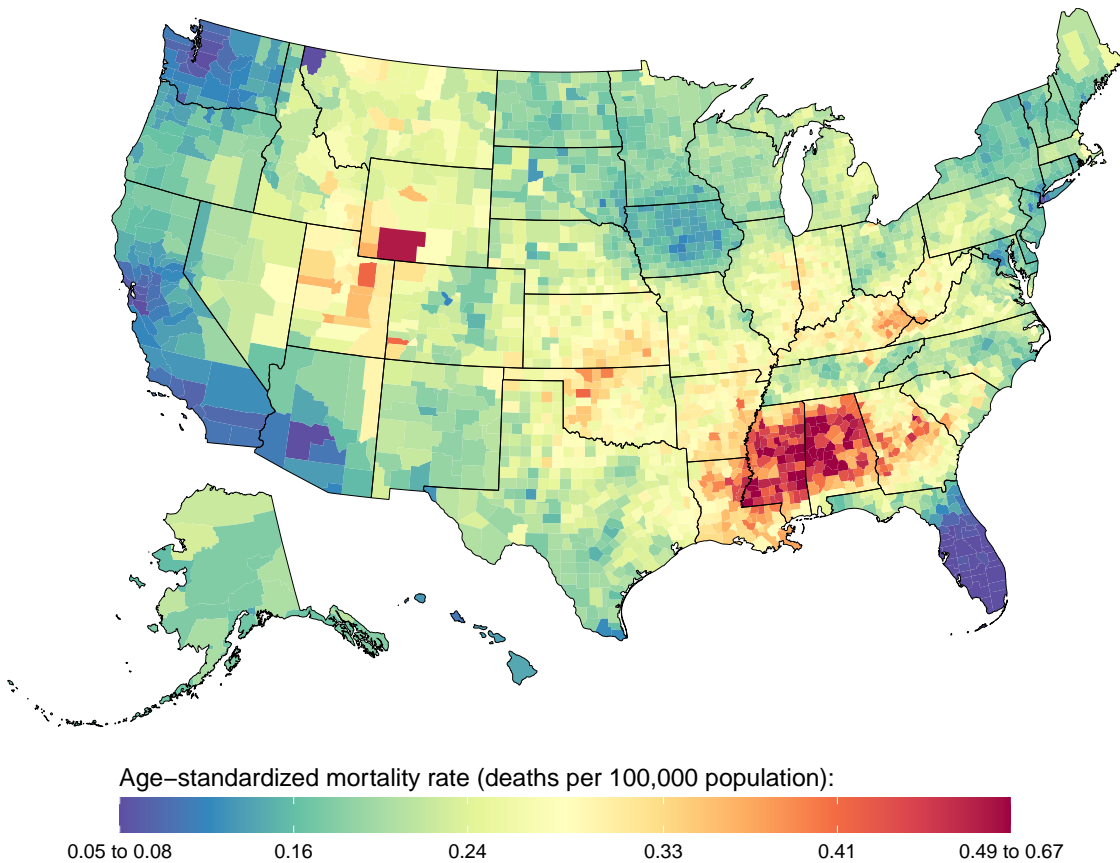

[B]

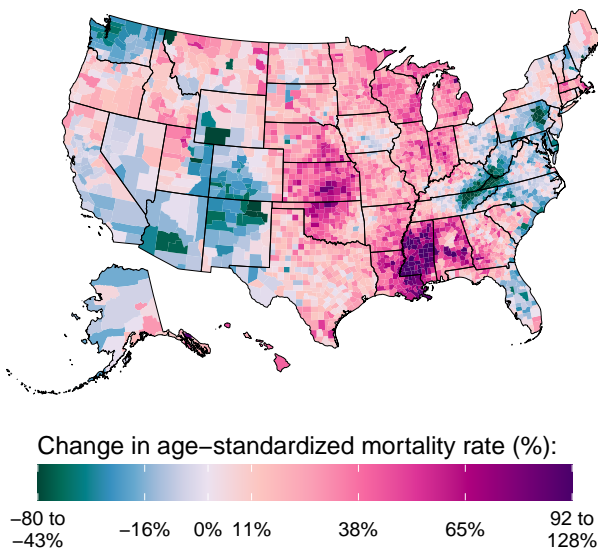

[C]

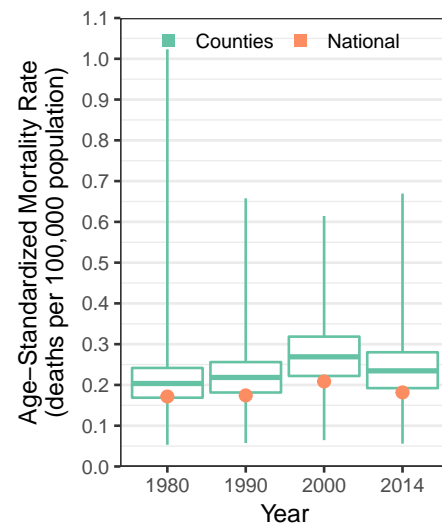

**eFigure 4: County-level mortality from other pneumoconiosis.** [A] Age-standardized mortality rate for both sexes combined in 2014; [B] Relative change in the age-standardized mortality rate for both sexes combined between 1980 and 2014; [C] Age-standardized mortality rate in 1980, 1990, 2000, and 2014. In panels [A] and [B], the color scale is truncated at approximately the 1st and 99th percentile as indicated by the range given in the color scale. In panel [C], the boxes indicate the 25th, 50th, and 75th percentile across all counties while the lines indicate the full range across counties and the dots indicate the national-level rate.

**eTable 1: Data sources used for covariates.**

| Data Sources                                                                                                                                                                                     | Data Processing                                                                                                                                                                                                                                                                                                                                                   |
|--------------------------------------------------------------------------------------------------------------------------------------------------------------------------------------------------|-------------------------------------------------------------------------------------------------------------------------------------------------------------------------------------------------------------------------------------------------------------------------------------------------------------------------------------------------------------------|
| Percent of the population age 25 and older who have completed high school                                                                                                                        |                                                                                                                                                                                                                                                                                                                                                                   |
| 1980 census [1]; 1990 census [2]; 2000 census [3]; 2009-2014 ACS [4-9]                                                                                                                           | Linear interpolation was used fill in intermediate years between data sources. The rate of change calculated between 2007 and 2012 was applied to fill in estimates for 2013 and 2014.                                                                                                                                                                            |
| Percent of the population who are Hispanic                                                                                                                                                       |                                                                                                                                                                                                                                                                                                                                                                   |
| 1980 census [10]; 1990-2014 NCHS Bridged Race Files [11-13]                                                                                                                                      | Linear interpolation was used to fill in intermediate years between data sources.                                                                                                                                                                                                                                                                                 |
| Percent of the population who are Black and some other race                                                                                                                                      |                                                                                                                                                                                                                                                                                                                                                                   |
| 1980-1989 Census Bureau Intercensal County Estimates by Age, Sex, and Race [14]; 1990-2014 NCHS Bridged Race Files [11-13]                                                                       | Linear interpolation was used to fill in intermediate years between data sources.                                                                                                                                                                                                                                                                                 |
| Percent of land area in a Native American reservation                                                                                                                                            |                                                                                                                                                                                                                                                                                                                                                                   |
| 2013 Cartographic Boundary File, State-County for United States [15]; AIANNH Areas National Shapefile [16]                                                                                       | Geographic boundaries of AIANNH Areas were intersected with county boundaries using ArcGIS. The area of the intersection and the area of the county were calculated using an Albers Equal Area Conic projection. The proportion of the land area that is in a reservation was generated by dividing the area of the reservation by the total area in each county. |
| Household Median Income                                                                                                                                                                          |                                                                                                                                                                                                                                                                                                                                                                   |
| 1980 census [17]; 1989, 1993, 1995-2014 Small Area Income and Poverty Estimates [18]; 1980-2014 Bureau of Labor Statistics, Consumer Price Index [19]                                            | Data were adjusted for inflation using the consumer price index, and linear interpolation was used to generate values between observed data points. Income was then log-transformed.                                                                                                                                                                              |
| Population Density                                                                                                                                                                               |                                                                                                                                                                                                                                                                                                                                                                   |
| 1980-1989 Census Bureau Intercensal County Estimates by Age, Sex, and Race [14]; 1990-2014 NCHS Bridged Race Files [11-13]; 2013 Cartographic Boundary File, State-County for United States [15] | The area of each county was calculated using an Albers Equal Area Conic projection. The total population of each county was divided by the total area of the county, and was then log-transformed.                                                                                                                                                                |

- [1] Missouri Census Data Center. 1980 Census Summary Tape File 3, Table NT48A. MCDC Data Archive (Uexplore/Dexter). <http://mcdc2.missouri.edu/applications/uexplore.shtml>. Accessed April 22, 2013.
- [2] Minnesota Population Center. 1990 Census Summary Tape File 3, Table P057. National Historical Geographic Information System: Version 2.0. Minneapolis, MN: University of Minnesota 2011. <http://www.nhgis.org>. Accessed July 18, 2013.
- [3] US Census Bureau. 2000 Census Summary Tape File 3, Table DP2. <http://factfinder2.census.gov>. Accessed April 18, 2013.
- [4] US Census Bureau. 2009 American Community Survey 5-Year Estimates, Table S1501. <http://factfinder2.census.gov>. Accessed April 17, 2013.
- [5] US Census Bureau. 2010 American Community Survey 5-Year Estimates, Table S1501. <http://factfinder2.census.gov>. Accessed April 17, 2013.
- [6] US Census Bureau. 2011 American Community Survey 5-Year Estimates, Table S1501. <http://factfinder2.census.gov>. Accessed April 17, 2013.
- [7] US Census Bureau. 2012 American Community Survey 5-Year Estimates, Table S1501. <http://factfinder2.census.gov>. Accessed December 18, 2013.
- [8] US Census Bureau. American Community Survey, 2013 American Community Survey 5-Year Estimates, Table S1501. <http://factfinder2.census.gov>. Accessed December 23, 2014.
- [9] US Census Bureau. American Community Survey, 2014 American Community Survey 5-Year Estimates, Table S1501. <http://factfinder2.census.gov>. Accessed December 8, 2015.
- [10] Minnesota Population Center. 1980 Census Summary Tape File 1, Table NT8. National Historical Geographic Information System: Version 2.0. Minneapolis, MN: University of Minnesota 2011. <http://www.nhgis.org>. Accessed January 13, 2016.
- [11] National Center for Health Statistics. United States Bridged-Race Intercensal Population Estimates 1990-1999. [http://www.cdc.gov/nchs/nvss/bridged\\_race.htm](http://www.cdc.gov/nchs/nvss/bridged_race.htm). Accessed November 21, 2011.
- [12] National Center for Health Statistics. United States Bridged-Race Intercensal Population Estimates 2000-2009. [http://www.cdc.gov/nchs/nvss/bridged\\_race.htm](http://www.cdc.gov/nchs/nvss/bridged_race.htm). Accessed October 30, 2012.
- [13] National Center for Health Statistics. United States Vintage 2014 Bridged-Race Postcensal Population Estimates 2010-2014. [http://www.cdc.gov/nchs/nvss/bridged\\_race.htm](http://www.cdc.gov/nchs/nvss/bridged_race.htm). Accessed December 18, 2015.
- [14] US Census Bureau. Intercensal County Estimates by Age, Sex, Race: 1980-1989. <http://www.census.gov/popest/data/counties/asrh/1980s/PE-02.html>. Accessed January 8, 2015.
- [15] US Census Bureau. TIGER/Line Shapefile, 2013 Cartographic Boundary File, State-County for United States, 1:20,000,000. <https://catalog.data.gov/dataset/2013-cartographic-boundary-file-state-county-for-united-states-1-20000000>. Accessed February 2, 2015.
- [16] US Census Bureau. TIGER/Line Shapefile, 2012, Series Information File for the Nation, Current American Indian/Alaska Native/Native Hawaiian Areas (AIANNH) National Shapefile. <http://catalog.data.gov/dataset/tiger-line-shapefile-2012-series-information-file-for-the-nation-current-american-indian-alaska>. Accessed February 10, 2015.

[17] Minnesota Population Center. Summary Tape File 3, Table NT69. National Historical Geographic Information System: Version 2.0. Minneapolis, MN: University of Minnesota 2011. <http://www.nhgis.org>. Accessed November 12, 2015.

[18] US Census Bureau. Small Area Income and Poverty Estimates. <https://www.census.gov/did/www/saipe/data/statecounty/data/index.html>. Accessed December 28, 2015.

[19] US Bureau of Labor Statistics. Consumer Price Index: All Urban Consumers History, All Items 1913-2015. <http://www.bls.gov/data/>. Accessed March 25, 2015.



**eTable 2: Counties combined to ensure historically stable units of analysis.**

| State        | Group | Areas                                                                                                                                                                                                                                 |
|--------------|-------|---------------------------------------------------------------------------------------------------------------------------------------------------------------------------------------------------------------------------------------|
| Alaska       | 1     | Kusilvak Census Area (2158), Wade Hampton Census Area (2270)*                                                                                                                                                                         |
|              | 2     | Kobuk Census Area (2140)*, Northwest Arctic Borough (2188)                                                                                                                                                                            |
|              | 3     | Aleutian Islands Census Area (2010)*, Aleutians East Borough (2013), Aleutians West Census Area (2016)                                                                                                                                |
|              | 4     | Dillingham Census Area (2070), Lake and Peninsula Borough (2164)                                                                                                                                                                      |
|              | 5     | Denali Borough (2068), Yukon-Koyukuk Census Area (2290)                                                                                                                                                                               |
|              | 6     | Hoonah-Angoon Census Area (2105), Skagway Municipality (2230), Skagway-Yakutat-Angoon Census Area (2231)*, Skagway-Hoonah-Angoon Census Area (2232)*, Yakutat City and Borough (2282)                                                 |
|              | 7     | Ketchikan Gateway Borough (2130), Petersburg Borough (2195), Prince of Wales-Hyder Census Area (2198), Prince of Wales-Outer Ketchikan Census Area (2201)*, Wrangell City and Borough (2275), Wrangell-Petersburg Census Area (2280)* |
| Arizona      | 1     | La Paz County (4012), Yuma County (4027)                                                                                                                                                                                              |
| Colorado     | 1     | Adams County (8001), Arapahoe County (8005), Boulder County (8013), Broomfield County (8014), Denver County (8031), Jefferson County (8059), Weld County (8123)                                                                       |
| Florida      | 1     | Dade County (12025)*, Miami-Dade County (12086)                                                                                                                                                                                       |
| Hawaii       | 1     | Kalawao County (15005), Maui County (15009)                                                                                                                                                                                           |
| Maryland     | 1     | Montgomery County (24031), Prince George's County (24033)                                                                                                                                                                             |
| Montana      | 1     | Park County (30067), Yellowstone National Park (30113)*                                                                                                                                                                               |
| New Mexico   | 1     | Cibola County (35006), Valencia County (35061)                                                                                                                                                                                        |
| South Dakota | 1     | Oglala Lakota County (46102), Shannon County (46113)*                                                                                                                                                                                 |
|              | 2     | Jackson County (46071), Washabaugh County (46131)*                                                                                                                                                                                    |
| Virginia     | 1     | Fairfax County (51059), Fairfax City (51600)                                                                                                                                                                                          |
|              | 2     | Rockingham County (51165), Harrisonburg City (51660)                                                                                                                                                                                  |
|              | 3     | James City County (51095), Williamsburg City (51830)                                                                                                                                                                                  |
|              | 4     | Prince William County (51153), Manassas City (51683), Manassas Park City (51685)                                                                                                                                                      |
|              | 5     | Rockbridge County (51163), Buena Vista City (51530)                                                                                                                                                                                   |
|              | 6     | Spotsylvania County (51177), Fredericksburg City (51630)                                                                                                                                                                              |
|              | 7     | Augusta County (51015), Staunton City (51790), Waynesboro City (51820)                                                                                                                                                                |
|              | 8     | Pittsylvania County (51143), Danville City (51590)                                                                                                                                                                                    |
|              | 9     | Greensville County (51081), Emporia City (51595)                                                                                                                                                                                      |
|              | 10    | Albemarle County (51003), Charlottesville City (51540)                                                                                                                                                                                |
|              | 11    | Bedford County (51019), Bedford City (51515)*                                                                                                                                                                                         |
|              | 12    | Halifax County (51083), South Boston City (51780)*                                                                                                                                                                                    |
|              | 13    | Southampton County (51175), Franklin City (51620)                                                                                                                                                                                     |
|              | 14    | Alleghany County (51005), Clifton Forge City (51560)*                                                                                                                                                                                 |
|              | 15    | York County (51199), Newport News City (51700)                                                                                                                                                                                        |

\*County no longer exists due to boundary or name change.

**eTable 3: GBD cause list and associated ICD9 and ICD10 codes.**

| Cause                                                             | Level | ICD9                                                                                                                                                                                                                                                                                                                                                                                                                                                                                                                                                                                                                                                                                                                                                                                                                          | ICD10                                                                                                                                                                                                                                                                                                                                                                                                                                                                                                                                                                                                                                                                                                                                                                                                                                                                                                                                                                                                                                                                                                                                                                          |
|-------------------------------------------------------------------|-------|-------------------------------------------------------------------------------------------------------------------------------------------------------------------------------------------------------------------------------------------------------------------------------------------------------------------------------------------------------------------------------------------------------------------------------------------------------------------------------------------------------------------------------------------------------------------------------------------------------------------------------------------------------------------------------------------------------------------------------------------------------------------------------------------------------------------------------|--------------------------------------------------------------------------------------------------------------------------------------------------------------------------------------------------------------------------------------------------------------------------------------------------------------------------------------------------------------------------------------------------------------------------------------------------------------------------------------------------------------------------------------------------------------------------------------------------------------------------------------------------------------------------------------------------------------------------------------------------------------------------------------------------------------------------------------------------------------------------------------------------------------------------------------------------------------------------------------------------------------------------------------------------------------------------------------------------------------------------------------------------------------------------------|
| Communicable, maternal, neonatal, and nutritional diseases        | 1     | 001-001.9, 002.0-030.9, 032-034.9, 036-036.40, 036.5, 036.8-037.9, 039-039.4, 039.8-040, 040.1-041.09, 042-066.9, 070-070.21, 070.3-070.31, 070.4-070.43, 070.49-070.53, 070.59-074.1, 074.20, 074.3-075.9, 078.4-078.7, 079-079.7, 080-083.9, 084.0-084.5, 084.7-084.9, 085.0, 086-088.9, 090-101.6, 104-104.9, 120-124.9, 125.4-125.9, 127-127.1, 128-129.0, 136-136.29, 137-139.0, 244.2, 260-263.9, 265-269.9, 280.1-280.8, 281.0-281.9, 320.0-320.89, 321-323.9, 381-383.9, 390-390.9, 392, 392.9, 461-461.9, 464.0, 464.01, 464.11-464.2, 464.21, 464.31-464.4, 464.8-464.9, 466-469, 470.0, 475-475.9, 476.9, 480-482.89, 483.0-483.9, 484.0-484.7, 487-489, 613-614.9, 630-636.92, 638-638.92, 640-679.14, 716.0-716.09, 730.4-730.6, 760-760.64, 760.8-768, 768.2-770, 770.1-775, 775.4-779.34, 779.6-779.89, 787.91 | A00-A00.9, A01.0-A14, A15-A28.9, A30-A30.9, A32-A39.4, A39.8-A39.9, A48.1-A48.2, A48.4-A48.52, A49.1, A50-A58, A60-A60.9, A63-A63.8, A65-A65.0, A68-A70, A74, A74.8-A75.9, A77-A96.9, A98-A98.8, B00-B06.9, B10-B10.89, B15-B17.9, B19-B27.99, B29.4, B33-B33.1, B33.3-B33.8, B47-B48.8, B50-B53.8, B55.0, B56-B57.5, B60-B60.8, B63, B65-B67.99, B69-B72.0, B74.3-B75, B77-B77.9, B83-B83.8, B90-B92, B94.1-B94.2, B95-B95.5, D50.1-D50.8, D51-D52.0, D52.8-D53.9, D64.3, D86.81, E00-E02, E40-E46.9, E51-E61.9, E63-E64.0, E64.2-E64.9, F07.1, G00.0-G00.8, G03-G03.8, G04-G05.8, G14-G14.6, H70-H70.93, I00, I02, I02.9, I98.0-I98.1, J01-J01.91, J02.0, J03.0-J03.01, J04.0, J05-J05.0, J05.11, J09-J15.8, J16-J16.9, J20-J21.9, J36-J36.0, K67.0-K67.8, K74.7-K74.8, K93.0, M03.1, M12.1-M12.19, M49.0-M49.1, M73.0-M73.1, M89.6-M89.69, N70-N71.9, N73-N74.8, N96, N98-N98.9, O00-O07.9, O09-O16.9, O20-O26.93, O28-O36.93, O40-O48.1, O60-O77.9, O80-O92.79, O96-P04.2, P04.5-P05.9, P07-P15.9, P19-P22.9, P23.0-P23.4, P24-P29.9, P35-P37.2, P37.5-P39.9, P50-P61.9, P70, P70.3-P72.9, P74-P78.9, P80-P81.9, P83-P84, P90-P94.9, P96, P96.3-P96.4, P96.8-P96.89, R19.7 |
| HIV/AIDS and tuberculosis                                         | 2     | 010-019.9, 042-044.9, 137-137.9, 138.0-138.9, 730.4-730.6                                                                                                                                                                                                                                                                                                                                                                                                                                                                                                                                                                                                                                                                                                                                                                     | A10-A14, A15-A19.9, B20-B24.9, B90-B90.9, K67.3, K93.0, M49.0, P37.0                                                                                                                                                                                                                                                                                                                                                                                                                                                                                                                                                                                                                                                                                                                                                                                                                                                                                                                                                                                                                                                                                                           |
| Tuberculosis                                                      | 3-4   | 010-019.9, 137-137.9, 138.0-138.9, 730.4-730.6                                                                                                                                                                                                                                                                                                                                                                                                                                                                                                                                                                                                                                                                                                                                                                                | A10-A14, A15-A19.9, B90-B90.9, K67.3, K93.0, M49.0, P37.0                                                                                                                                                                                                                                                                                                                                                                                                                                                                                                                                                                                                                                                                                                                                                                                                                                                                                                                                                                                                                                                                                                                      |
| HIV/AIDS                                                          | 3     | 042-044.9                                                                                                                                                                                                                                                                                                                                                                                                                                                                                                                                                                                                                                                                                                                                                                                                                     | B20-B24.9                                                                                                                                                                                                                                                                                                                                                                                                                                                                                                                                                                                                                                                                                                                                                                                                                                                                                                                                                                                                                                                                                                                                                                      |
| HIV/AIDS - Tuberculosis                                           | 4     |                                                                                                                                                                                                                                                                                                                                                                                                                                                                                                                                                                                                                                                                                                                                                                                                                               | B20.0                                                                                                                                                                                                                                                                                                                                                                                                                                                                                                                                                                                                                                                                                                                                                                                                                                                                                                                                                                                                                                                                                                                                                                          |
| HIV/AIDS resulting in other diseases                              | 4     | 042.0-042.9, 043.0-043.9, 044.1-044.9                                                                                                                                                                                                                                                                                                                                                                                                                                                                                                                                                                                                                                                                                                                                                                                         | B20.1-B23.9, B24.0                                                                                                                                                                                                                                                                                                                                                                                                                                                                                                                                                                                                                                                                                                                                                                                                                                                                                                                                                                                                                                                                                                                                                             |
| Diarrhea, lower respiratory, and other common infectious diseases | 2     | 001-001.9, 002.0-009.9, 032-033.9, 036-036.40, 036.5, 036.8-037.9, 047-049.9, 052-053.9, 055-055.9, 062-064.9, 073.0-073.6, 139.0, 320.0-320.89, 321-323, 323.1, 323.4-323.9, 381-383.9, 461-461.9, 464.0, 464.01, 464.11-464.2, 464.21, 464.31-464.4, 464.8-464.9, 466-469, 470.0, 475-475.9, 476.9, 480-482.89, 483.0-483.9, 484.0-484.4, 484.6-484.7, 487-489, 771.3, 787.91                                                                                                                                                                                                                                                                                                                                                                                                                                               | A00-A00.9, A01.0-A09.9, A33-A37.91, A39-A39.4, A39.8-A39.9, A48.1, A70, A83-A87.9, B01-B02.9, B05-B05.9, B94.1, D86.81, F07.1, G00.0-G00.8, G03-G03.8, G04-G05.8, H70-H70.93, J01-J01.91, J04.0, J05-J05.0, J05.11, J09-J15.8, J16-J16.9, J20-J21.9, J36-J36.0, P23.0-P23.4, P35.8, R19.7                                                                                                                                                                                                                                                                                                                                                                                                                                                                                                                                                                                                                                                                                                                                                                                                                                                                                      |
| Diarrheal diseases                                                | 3-4   | 001-001.9, 003-006.9, 007.4-007.8, 008.01-008.02, 008.04, 008.2-009.9, 787.91                                                                                                                                                                                                                                                                                                                                                                                                                                                                                                                                                                                                                                                                                                                                                 | A00-A00.9, A02-A04.1, A04.3, A04.5-A07, A07.2-A07.4, A08-A09.9, R19.7                                                                                                                                                                                                                                                                                                                                                                                                                                                                                                                                                                                                                                                                                                                                                                                                                                                                                                                                                                                                                                                                                                          |
| Intestinal infectious diseases                                    | 3     | 002.0-002.9, 007-007.3, 007.9-008.00, 008.03, 008.09-008.1                                                                                                                                                                                                                                                                                                                                                                                                                                                                                                                                                                                                                                                                                                                                                                    | A01.0-A01.4, A04.2, A04.4, A07.0-A07.1, A07.8-A07.9                                                                                                                                                                                                                                                                                                                                                                                                                                                                                                                                                                                                                                                                                                                                                                                                                                                                                                                                                                                                                                                                                                                            |
| Typhoid fever                                                     | 4     | 2                                                                                                                                                                                                                                                                                                                                                                                                                                                                                                                                                                                                                                                                                                                                                                                                                             | A01.0-A01.09                                                                                                                                                                                                                                                                                                                                                                                                                                                                                                                                                                                                                                                                                                                                                                                                                                                                                                                                                                                                                                                                                                                                                                   |
| Paratyphoid fever                                                 | 4     | 002.1-002.9                                                                                                                                                                                                                                                                                                                                                                                                                                                                                                                                                                                                                                                                                                                                                                                                                   | A01.1-A01.4                                                                                                                                                                                                                                                                                                                                                                                                                                                                                                                                                                                                                                                                                                                                                                                                                                                                                                                                                                                                                                                                                                                                                                    |
| Other intestinal infectious diseases                              | 4     | 007-007.3, 007.9-008.00, 008.03, 008.09-008.1                                                                                                                                                                                                                                                                                                                                                                                                                                                                                                                                                                                                                                                                                                                                                                                 | A04.2, A04.4, A07.0-A07.1, A07.8-A07.9                                                                                                                                                                                                                                                                                                                                                                                                                                                                                                                                                                                                                                                                                                                                                                                                                                                                                                                                                                                                                                                                                                                                         |
| Lower respiratory infections                                      | 3-4   | 073.0-073.6, 466-469, 470.0, 480-482.89, 483.0-483.9, 484.1-484.2, 484.6-484.7, 487-489                                                                                                                                                                                                                                                                                                                                                                                                                                                                                                                                                                                                                                                                                                                                       | A48.1, A70, J09-J15.8, J16-J16.9, J20-J21.9, P23.0-P23.4                                                                                                                                                                                                                                                                                                                                                                                                                                                                                                                                                                                                                                                                                                                                                                                                                                                                                                                                                                                                                                                                                                                       |
| Upper respiratory infections                                      | 3-4   | 461-461.9, 464.0, 464.01, 464.11-464.2, 464.21, 464.31-464.4, 464.8-464.9, 475-475.9, 476.9                                                                                                                                                                                                                                                                                                                                                                                                                                                                                                                                                                                                                                                                                                                                   | J01-J01.91, J04.0, J05-J05.0, J05.11, J36-J36.0                                                                                                                                                                                                                                                                                                                                                                                                                                                                                                                                                                                                                                                                                                                                                                                                                                                                                                                                                                                                                                                                                                                                |
| Otitis media                                                      | 3-4   | 381-383.9                                                                                                                                                                                                                                                                                                                                                                                                                                                                                                                                                                                                                                                                                                                                                                                                                     | H70-H70.93                                                                                                                                                                                                                                                                                                                                                                                                                                                                                                                                                                                                                                                                                                                                                                                                                                                                                                                                                                                                                                                                                                                                                                     |
| Meningitis                                                        | 3     | 036-036.40, 036.5, 036.8-036.9, 047-049.9, 320.0-320.89, 321-322.9                                                                                                                                                                                                                                                                                                                                                                                                                                                                                                                                                                                                                                                                                                                                                            | A39-A39.4, A39.8-A39.9, A87-A87.9, D86.81, G00.0-G00.8, G03-G03.8                                                                                                                                                                                                                                                                                                                                                                                                                                                                                                                                                                                                                                                                                                                                                                                                                                                                                                                                                                                                                                                                                                              |

**eTable 3: GBD cause list and associated ICD9 and ICD10 codes (continued).**

| Cause                                                 | Level | ICD9                                                                                                                                                   | ICD10                                                                                                                                                                                                             |
|-------------------------------------------------------|-------|--------------------------------------------------------------------------------------------------------------------------------------------------------|-------------------------------------------------------------------------------------------------------------------------------------------------------------------------------------------------------------------|
| Pneumococcal meningitis                               | 4     | 320.1                                                                                                                                                  | G00.1                                                                                                                                                                                                             |
| H influenzae type B meningitis                        | 4     | 320                                                                                                                                                    | G00.0                                                                                                                                                                                                             |
| Meningococcal meningitis                              | 4     | 036-036.40, 036.5, 036.8-036.9                                                                                                                         | A39-A39.4, A39.8-A39.9                                                                                                                                                                                            |
| Other meningitis                                      | 4     | 047-049.9, 320.2-320.89, 321-322.9                                                                                                                     | A87-A87.9, D86.81, G00.2-G00.8, G03-G03.8                                                                                                                                                                         |
| Encephalitis                                          | 3-4   | 062-064.9, 139.0, 323, 323.4-323.9                                                                                                                     | A83-A86.4, B94.1, F07.1, G04-G05.8                                                                                                                                                                                |
| Diphtheria                                            | 3-4   | 032-032.9                                                                                                                                              | A36-A36.9                                                                                                                                                                                                         |
| Whooping cough                                        | 3-4   | 033-033.9, 484.3-484.4                                                                                                                                 | A37-A37.91                                                                                                                                                                                                        |
| Tetanus                                               | 3-4   | 037-037.9, 771.3                                                                                                                                       | A33-A35.0                                                                                                                                                                                                         |
| Measles                                               | 3-4   | 055-055.9, 323.1, 484.0                                                                                                                                | B05-B05.9                                                                                                                                                                                                         |
| Varicella and herpes zoster                           | 3-4   | 052-053.9                                                                                                                                              | B01-B02.9, P35.8                                                                                                                                                                                                  |
| Neglected tropical diseases and malaria               | 2     | 030-030.9, 060-061.8, 065-066.9, 071-071.9, 080, 080.2-083.9, 084.0-084.5, 084.7-084.9, 085.0, 086-088.9, 120-124.9, 125.4-125.9, 127-127.1, 128-129.0 | A30-A30.9, A68-A68.9, A69.2-A69.9, A75-A75.9, A77-A79.9, A82-A82.9, A90-A96.9, A98-A98.8, B33.0-B33.1, B50-B53.8, B55.0, B56-B57.5, B60-B60.8, B65-B67.99, B69-B72.0, B74.3-B75, B77-B77.9, B83-B83.8, B92, P37.1 |
| Malaria                                               | 3-4   | 084.0-084.5, 084.7-084.9                                                                                                                               | B50-B53.8                                                                                                                                                                                                         |
| Chagas disease                                        | 3-4   | 086-086.2, 086.9                                                                                                                                       | B57-B57.5                                                                                                                                                                                                         |
| Leishmaniasis                                         | 3     | 85                                                                                                                                                     | B55.0                                                                                                                                                                                                             |
| Visceral leishmaniasis                                | 4     | 85                                                                                                                                                     | B55.0                                                                                                                                                                                                             |
| African trypanosomiasis                               | 3-4   | 086.3-086.5                                                                                                                                            | B56-B56.9                                                                                                                                                                                                         |
| Schistosomiasis                                       | 3-4   | 120-120.9                                                                                                                                              | B65-B65.9                                                                                                                                                                                                         |
| Cysticercosis                                         | 3-4   | 123.1                                                                                                                                                  | B69-B69.9                                                                                                                                                                                                         |
| Cystic echinococcosis                                 | 3-4   | 122-122.4, 122.8-122.9                                                                                                                                 | B67-B67.4, B67.8-B67.99                                                                                                                                                                                           |
| Dengue                                                | 3-4   | 061-061.8                                                                                                                                              | A90-A91.9                                                                                                                                                                                                         |
| Yellow fever                                          | 3-4   | 060-060.9                                                                                                                                              | A95-A95.9                                                                                                                                                                                                         |
| Rabies                                                | 3-4   | 071-071.9                                                                                                                                              | A82-A82.9                                                                                                                                                                                                         |
| Intestinal nematode infections                        | 3     | 127                                                                                                                                                    | B77-B77.9                                                                                                                                                                                                         |
| Ascariasis                                            | 4     | 127                                                                                                                                                    | B77-B77.9                                                                                                                                                                                                         |
| Ebola                                                 | 3-4   |                                                                                                                                                        | A98.4                                                                                                                                                                                                             |
| Other neglected tropical diseases                     | 3-4   | 065-066.9, 080, 080.2-083.9, 087-088.9, 122.5-122.7, 123-123.0, 123.2-124.9, 125.4-125.9, 127, 127.1, 128-129.0                                        | A68-A68.9, A69.2-A69.9, A75-A75.9, A77-A79.9, A92-A94.0, A96-A96.9, A98-A98.3, A98.5-A98.8, B33.0-B33.1, B60-B60.8, B67.5-B67.7, B70-B72.0, B74.3-B75, B83-B83.8, P37.1                                           |
| Maternal disorders                                    | 2     | 630-636.92, 638-638.92, 640-679.14                                                                                                                     | N96, N98-N98.9, O00-O07.9, O09-O16.9, O20-O26.93, O28-O36.93, O40-O48.1, O60-O77.9, O80-O92.79, O96-O99.91                                                                                                        |
| Maternal hemorrhage                                   | 3-4   | 640-641.93, 661-661.93, 665, 666-666.9                                                                                                                 | O20-O20.9, O43.2-O43.239, O44-O46.93, O62-O62.9, O67-O67.9, O70, O72-O72.3                                                                                                                                        |
| Maternal sepsis and other maternal infections         | 3-4   | 659.3-659.33, 670-670.9                                                                                                                                | O23-O23.93, O85-O86.89, O91-O91.23                                                                                                                                                                                |
| Maternal hypertensive disorders                       | 3-4   | 642-642.94                                                                                                                                             | O10-O16.9                                                                                                                                                                                                         |
| Maternal obstructed labor and uterine rupture         | 3-4   | 652-653.93, 660-660.93, 665.0-665.34                                                                                                                   | O32-O33.9, O64-O66.9, O71-O71.9                                                                                                                                                                                   |
| Maternal abortion, miscarriage, and ectopic pregnancy | 3-4   | 630-636.92, 638-638.92, 646.3-646.33                                                                                                                   | N96, O00-O07.9                                                                                                                                                                                                    |
| Indirect maternal deaths                              | 3-4   | 646-646.24, 646.4-649.9, 674-674.94                                                                                                                    | O24-O25.3, O98-O99.91                                                                                                                                                                                             |
| Late maternal deaths                                  | 3-4   |                                                                                                                                                        | O96-O97.9                                                                                                                                                                                                         |
| Maternal deaths aggravated by HIV/AIDS                | 3-4   |                                                                                                                                                        |                                                                                                                                                                                                                   |
| Other maternal disorders                              | 3-4   | 643-645.23, 650-651.93, 654-659.23, 659.4-659.93, 662-664.94, 665.4-665.94, 667-669.94, 671-673.9, 675-679.14                                          | N98-N98.9, O09-O09.93, O21-O22.93, O26-O26.93, O28-O31.8, O34-O36.93, O40-O43.199, O43.8-O43.93, O47-O48.1, O60-O61.9, O63-O63.9, O68-O69.9, O70.0-O70.9, O73-O77.9, O80-O84.9, O87-O90.9, O92-O92.79             |
| Neonatal disorders                                    | 2     | 760-760.64, 760.8-768, 768.2-770, 770.1-771, 771.4-775, 775.4-779.34, 779.6-779.89                                                                     | P00-P04.2, P04.5-P05.9, P07-P15.9, P19-P22.9, P24-P29.9, P36-P36.9, P38-P39.9, P50-P61.9, P70, P70.3-P72.9, P74-P78.9, P80-P81.9, P83-P84, P90-P94.9, P96, P96.3-P96.4, P96.8-P96.89                              |
| Neonatal preterm birth complications                  | 3-4   | 761.0-761.1, 765-765.9, 769-769.9, 770.2-770.9, 776.6, 777.5-777.6                                                                                     | P01.0-P01.1, P07-P07.39, P22-P22.9, P25-P28.9, P61.2, P77-P77.9                                                                                                                                                   |

**eTable 3: GBD cause list and associated ICD9 and ICD10 codes (continued).**

| Cause                                                            | Level | ICD9                                                                                                                                                                                                                                                                                                                                                                           | ICD10                                                                                                                                                                                                                                                                                                                                                                                                                                                                                                          |
|------------------------------------------------------------------|-------|--------------------------------------------------------------------------------------------------------------------------------------------------------------------------------------------------------------------------------------------------------------------------------------------------------------------------------------------------------------------------------|----------------------------------------------------------------------------------------------------------------------------------------------------------------------------------------------------------------------------------------------------------------------------------------------------------------------------------------------------------------------------------------------------------------------------------------------------------------------------------------------------------------|
| Neonatal encephalopathy due to birth asphyxia and trauma         | 3-4   | 761.7-763.9, 767-768, 768.2-768.9, 770.1-770.18, 772.1-772.9, 779.0-779.2                                                                                                                                                                                                                                                                                                      | P01.7, P02-P03.9, P10-P15.9, P20-P21.9, P24-P24.9, P90-P91.9                                                                                                                                                                                                                                                                                                                                                                                                                                                   |
| Neonatal sepsis and other neonatal infections                    | 3-4   | 771.4-771.9                                                                                                                                                                                                                                                                                                                                                                    | P36-P36.9, P38-P39.9                                                                                                                                                                                                                                                                                                                                                                                                                                                                                           |
| Hemolytic disease and other neonatal jaundice                    | 3-4   | 773-774.9                                                                                                                                                                                                                                                                                                                                                                      | P55-P59.9                                                                                                                                                                                                                                                                                                                                                                                                                                                                                                      |
| Other neonatal disorders                                         | 3-4   | 760-760.64, 760.8-761, 761.2-761.6, 764-764.99, 766-766.9, 770, 771, 772-772.0, 775, 775.4-776.5, 776.7-777.4, 777.7-779, 779.3-779.34, 779.6-779.89                                                                                                                                                                                                                           | P00-P01, P01.2-P01.6, P01.8-P01.9, P04-P04.2, P04.5-P05.9, P08-P09, P19-P19.9, P29-P29.9, P50-P54.9, P60-P61.1, P61.3-P61.9, P70, P70.3-P72.9, P74-P76.9, P78-P78.9, P80-P81.9, P83-P84, P92-P94.9, P96, P96.3-P96.4, P96.8-P96.89                                                                                                                                                                                                                                                                             |
| Nutritional deficiencies                                         | 2     | 244.2, 260-263.9, 265-269.9, 280.1-280.8, 281.0-281.9, 716.0-716.09                                                                                                                                                                                                                                                                                                            | D50.1-D50.8, D51-D52.0, D52.8-D53.9, D64.3, E00-E02, E40-E46.9, E51-E61.9, E63-E64.0, E64.2-E64.9, M12.1-M12.19                                                                                                                                                                                                                                                                                                                                                                                                |
| Protein-energy malnutrition                                      | 3-4   | 260-263.9                                                                                                                                                                                                                                                                                                                                                                      | E40-E46.9, E64.0                                                                                                                                                                                                                                                                                                                                                                                                                                                                                               |
| Iodine deficiency                                                | 3-4   | 244.2                                                                                                                                                                                                                                                                                                                                                                          | E00-E02                                                                                                                                                                                                                                                                                                                                                                                                                                                                                                        |
| Iron-deficiency anemia                                           | 3-4   | 280.1-280.8                                                                                                                                                                                                                                                                                                                                                                    | D50.1-D50.8, D64.3                                                                                                                                                                                                                                                                                                                                                                                                                                                                                             |
| Other nutritional deficiencies                                   | 3-4   | 265-269.9, 281.0-281.9, 716.0-716.09                                                                                                                                                                                                                                                                                                                                           | D51-D52.0, D52.8-D53.9, E51-E61.9, E63-E64, E64.2-E64.3, M12.1-M12.19                                                                                                                                                                                                                                                                                                                                                                                                                                          |
| Other communicable, maternal, neonatal, and nutritional diseases | 2     | 020-029, 034-034.9, 039-039.4, 039.8-040, 040.1-041.09, 045-046.9, 050-051.9, 054-054.9, 056-059.9, 070-070.21, 070.3-070.31, 070.4-070.43, 070.49-070.53, 070.59-070.9, 072-073, 073.7-074.1, 074.20, 074.3-075.9, 078.4-078.7, 079-079.7, 080.0, 090-101.6, 104-104.9, 136-136.29, 138, 139, 323.0-323.02, 323.2-323.3, 390-390.9, 392, 392.9, 484.5, 613-614.9, 771.0-771.2 | A20-A28.9, A32-A32.9, A38-A38.9, A48.2, A48.4-A48.52, A49.1, A50-A58, A60-A60.9, A63-A63.8, A65-A65.0, A69-A69.1, A74, A74.8-A74.9, A80-A81.9, A88-A89.9, B00-B00.9, B03-B04, B06-B06.9, B10-B10.89, B15-B17.9, B19-B19.9, B25-B27.99, B29.4, B33, B33.3-B33.8, B47-B48.8, B63, B91, B94.2, B95-B95.5, G14-G14.6, I00, I02, I02.9, I98.0-I98.1, J02.0, J03.0-J03.01, K67.0-K67.2, K67.8, K74.7-K74.8, M03.1, M49.1, M73.0-M73.1, M89.6-M89.69, N70-N71.9, N73-N74.8, P35-P35.3, P35.9, P37, P37.2, P37.5-P37.9 |
| Sexually transmitted diseases excluding HIV                      | 3     | 054.1, 090-099.9, 613-614.9                                                                                                                                                                                                                                                                                                                                                    | A50-A58, A60-A60.9, A63-A63.8, B63, I98.0, K67.0-K67.2, M03.1, M73.0-M73.1, N70-N71.9, N73-N74.8                                                                                                                                                                                                                                                                                                                                                                                                               |
| Syphilis                                                         | 4     | 090-097.9                                                                                                                                                                                                                                                                                                                                                                      | A50-A53.9, I98.0, K67.2, M03.1, M73.1                                                                                                                                                                                                                                                                                                                                                                                                                                                                          |
| Chlamydial infection                                             | 4     | 099, 099.1-099.6                                                                                                                                                                                                                                                                                                                                                               | A55-A56.8, K67.0                                                                                                                                                                                                                                                                                                                                                                                                                                                                                               |
| Gonococcal infection                                             | 4     | 098-098.9                                                                                                                                                                                                                                                                                                                                                                      | A54-A54.9, K67.1, M73.0                                                                                                                                                                                                                                                                                                                                                                                                                                                                                        |
| Other sexually transmitted diseases                              | 4     | 099.0, 099.8-099.9                                                                                                                                                                                                                                                                                                                                                             | A57-A58, A63-A63.8                                                                                                                                                                                                                                                                                                                                                                                                                                                                                             |
| Hepatitis                                                        | 3-4   | 070-070.21, 070.3-070.31, 070.4-070.43, 070.49-070.53, 070.59-070.9                                                                                                                                                                                                                                                                                                            | B15-B17.9, B19-B19.9, B94.2, P35.3                                                                                                                                                                                                                                                                                                                                                                                                                                                                             |
| Other infectious diseases                                        | 3-4   | 020-029, 034-034.9, 039-039.4, 039.8-040, 040.1-041.09, 045-046.9, 050-051.9, 054-054.0, 054.10-054.9, 056-059.9, 072-073, 073.7-074.1, 074.20, 074.3-075.9, 078.4-078.7, 079-079.7, 080.0, 100-101.6, 104-104.9, 136-136.29, 138, 139, 323.0-323.02, 323.2-323.3, 390-390.9, 392, 392.9, 484.5, 771.0-771.2                                                                   | A20-A28.9, A32-A32.9, A38-A38.9, A48.2, A48.4-A48.52, A49.1, A65-A65.0, A69-A69.1, A74, A74.8-A74.9, A80-A81.9, A88-A89.9, B00-B00.9, B03-B04, B06-B06.9, B10-B10.89, B25-B27.99, B29.4, B33, B33.3-B33.8, B47-B48.8, B91, B95-B95.5, G14-G14.6, I00, I02, I02.9, I98.1, J02.0, J03.0-J03.01, K67.8, K74.7-K74.8, M49.1, M89.6-M89.69, P35-P35.2, P35.9, P37, P37.2, P37.5-P37.9                                                                                                                               |
| Non-communicable diseases                                        | 1     | 035-035.9, 036.41-036.43, 036.6, 070.22-070.23, 070.32-070.33, 070.44, 070.54, 074.2, 074.21-074.23, 102-103.9, 133-133.6, 135-135.9, 136.6, 140-148.9                                                                                                                                                                                                                         | A39.5-A39.53, A46-A46.0, A66-A67.9, B18-B18.9, B33.2-B33.24, B86, C0-C13.9, C15-C25.9, C3-C34.92, C37-C38.8, C4-C41.9, C43-C45.9                                                                                                                                                                                                                                                                                                                                                                               |

eTable 3: GBD cause list and associated ICD9 and ICD10 codes (continued).

| Cause                                    | Level | ICD9                                                                                                                                                                                                                                                                                                                                                                                                                                                                                                                                                                                                                                                                                                                                                                                                                                                                                                                                                                                                                                                                                                                                                                                                                                                                                                                                                                                                                                                                                                                                                                                                                                                                                                                                                                                                                                                                                                     | ICD10                                                                                                                                                                                                                                                                                                                                                                                                                                                                                                                                                                                                                                                                                                                                                                                                                                                                                                                                                                                                                                                                                                                                                                                                                                                                                                                                                                                                                                                                                                                                                                                                                                                                                                                                           |
|------------------------------------------|-------|----------------------------------------------------------------------------------------------------------------------------------------------------------------------------------------------------------------------------------------------------------------------------------------------------------------------------------------------------------------------------------------------------------------------------------------------------------------------------------------------------------------------------------------------------------------------------------------------------------------------------------------------------------------------------------------------------------------------------------------------------------------------------------------------------------------------------------------------------------------------------------------------------------------------------------------------------------------------------------------------------------------------------------------------------------------------------------------------------------------------------------------------------------------------------------------------------------------------------------------------------------------------------------------------------------------------------------------------------------------------------------------------------------------------------------------------------------------------------------------------------------------------------------------------------------------------------------------------------------------------------------------------------------------------------------------------------------------------------------------------------------------------------------------------------------------------------------------------------------------------------------------------------------|-------------------------------------------------------------------------------------------------------------------------------------------------------------------------------------------------------------------------------------------------------------------------------------------------------------------------------------------------------------------------------------------------------------------------------------------------------------------------------------------------------------------------------------------------------------------------------------------------------------------------------------------------------------------------------------------------------------------------------------------------------------------------------------------------------------------------------------------------------------------------------------------------------------------------------------------------------------------------------------------------------------------------------------------------------------------------------------------------------------------------------------------------------------------------------------------------------------------------------------------------------------------------------------------------------------------------------------------------------------------------------------------------------------------------------------------------------------------------------------------------------------------------------------------------------------------------------------------------------------------------------------------------------------------------------------------------------------------------------------------------|
| Non-communicable diseases<br>(continued) | 1     | 150-158.9, 160-164.9, 170-175.9, 180-183.8, 184.0-184.4, 184.8, 185-186.9, 187.1-187.8, 188-188.9, 189.0-189.8, 190-194.8, 200-208.92, 209.0-209.17, 209.21-209.27, 209.31-209.57, 209.61, 209.63-209.67, 210.0-210.9, 211.0-211.8, 212.0-212.8, 213-213.9, 217-220.9, 221.0-221.8, 222.0-222.8, 223.0-223.89, 224-228.9, 229.0, 229.8, 230.1-230.8, 231.0-231.2, 232-232.9, 233.0-233.2, 233.31-233.32, 233.4-233.5, 233.7, 234.0-234.8, 235.0, 235.4, 235.6-235.8, 236.0-236.2, 236.4-236.5, 236.7, 236.91-237.3, 237.5-237.9, 238.0-238.5, 239.2-239.4, 239.6, 240-243.9, 244.0-244.1, 244.3-244.8, 245-246.9, 250-259.9, 270-273.9, 275-276, 277-277.2, 277.4-277.9, 278.0-278.8, 282-284.9, 286-286.5, 286.7-289.7, 290-292.9, 294.1-295.95, 303-303.93, 304.0-304.83, 305-305.93, 307.1, 307.51, 307.54, 327.2-327.8, 330-331.2, 331.5-337.9, 340-341.9, 345-345.91, 349-349.8, 353.6-353.9, 356-356.9, 357.0-357.7, 358-359.9, 376.0-376.1, 391-391.9, 392.0, 393-398.99, 402-404.93, 410-414.9, 416.1, 417-417.9, 420-423, 423.1-425.9, 427-427.32, 427.6-427.89, 429.0-429.1, 430-435.9, 437.0-437.2, 437.4-437.8, 441-443.9, 446-457.9, 459, 459.1-459.39, 470, 470.9-474.9, 476-476.1, 477-479, 490-504.9, 506-506.9, 508-509, 515, 516-517.8, 518.6-518.7, 518.9, 519.0-519.4, 530-536.1, 536.4-536.49, 537-537.6, 537.8-537.84, 538-543.9, 550-553.6, 555-558.9, 560-560.39, 560.8-560.9, 562-562.13, 564-564.7, 565-566.9, 569.0-569.44, 569.5-569.71, 569.84-569.85, 571-571.9, 572.3-572.9, 573.0-573.4, 573.8-577.9, 579-583.9, 585-585.9, 588-590.9, 592-593.89, 594-599.69, 599.8-599.89, 601-602.9, 604-604.99, 608.2-608.24, 610-610.9, 617-618.9, 620-620.9, 621.4-621.9, 622.3-622.7, 629-629.81, 680-689, 694-695.59, 707-707.9, 710-711.99, 714-714.33, 714.8-714.9, 728.86, 728.88, 730.1-730.19, 732-732.9, 733.0-733.19, 740-749.04, 749.2-758.9, 759.0-759.89, 760.7-760.79 | C47-C54.9, C56-C57.8, C58-C58.0, C60-C63.8, C64-C67.9, C68.0-C68.8, C69-C75.8, C81-C86.6, C88-C96.9, D00.00-D00.2, D01.0-D01.3, D02.0-D02.3, D03-D06.9, D07.0-D07.2, D07.4-D07.5, D09.0, D09.2-D09.3, D09.8, D10.0-D10.7, D11-D12.9, D13.0-D13.7, D14.0-D14.32, D15-D16.9, D22-D27.9, D28.0-D28.7, D29.0-D29.8, D30.0-D30.8, D31-D36, D36.1-D36.7, D37.01-D37.5, D38.0-D38.5, D39.1-D39.2, D39.8, D40.0-D40.8, D41.0-D41.8, D42-D43.9, D44.0-D44.8, D45-D45.9, D47-D47.0, D47.2-D47.9, D48.0-D48.62, D49.2-D49.4, D49.6, D49.81, D52.1, D55-D58.9, D59.0-D59.3, D59.5-D59.6, D60-D61.9, D63.1, D64.0, D64.4, D66-D67, D68.0-D69.8, D70-D75.89, D76-D78.89, D86-D86.8, D86.82-D86.9, D89-D89.3, E03-E07.1, E09-E14.9, E15.0, E16.0-E16.9, E20-E34.8, E36-E36.8, E65-E68, E70-E85.29, E87.71, E88-E89.9, F00-F03.91, F06.2, F10-F16.99, F18-F29.9, F50.0-F50.5, G10-G13.8, G20-G26.0, G30-G31.9, G35-G37.9, G40-G41.9, G45-G46.8, G47.3-G47.39, G61-G61.9, G70-G73.7, G90-G90.9, G93.7, G95-G95.9, G97-G97.9, H05.0-H05.119, I01-I01.9, I02.0, I05-I09.9, I11-I13.9, I20-I25.9, I27.1, I28-I28.8, I30-I31.1, I31.8-I43.9, I47-I48.92, I51.0-I51.5, I60-I61.9, I62.0-I62.03, I63-I63.9, I65-I66.9, I67.0-I67.3, I67.5-I67.7, I68.0-I68.2, I69.0-I69.398, I70.2-I70.799, I71-I73.9, I77-I89.9, I91.9, I95.2-I95.3, I97-I98, I98.2, I98.9, J30-J35.9, J37-J47.9, J60-J63.8, J65-J68.9, J70-J70.9, J82, J84-J84.9, J91-J92.9, J95-J95.9, K20-K29.91, K31-K31.89, K35-K38.9, K40-K46.9, K50-K52.9, K55-K62.9, K63.5, K64-K64.9, K66.8, K67, K68-K68.9, K70-K70.9, K71.3-K71.51, K71.7, K72.1-K74.69, K74.9, K75.2-K77.8, K80-K83.9, K85-K86.9, K90-K91.9, K92.8-K92.89, K94-K95.89, L00-L05.92, L08-L08.9, L10-L14.0, L51-L51.9, L88-L89.95, L93-L93.2 |
| Non-communicable diseases<br>(continued) | 1     | 775.0-775.3, 779.4-779.5, 780.57, 780.59, 780.62-780.63, 786.03, 787.1, 788.0, 790.2-790.22, 790.3, 798-798.0, E850-E850.29, E850.9-E854.39, E860-E860.19                                                                                                                                                                                                                                                                                                                                                                                                                                                                                                                                                                                                                                                                                                                                                                                                                                                                                                                                                                                                                                                                                                                                                                                                                                                                                                                                                                                                                                                                                                                                                                                                                                                                                                                                                | L97-L98.499, M00-M03.0, M03.2-M03.6, M05-M09.8, M30-M36.8, M40-M43.19, M65-M65.08, M71.0-M71.19, M80-M82.8, M86.3-M86.49, M87-M87.19, M88-M89.09, M89.5-M89.59, M89.7-M89.9, N00-N08.8, N10-N12.9, N14-N16.8, N18-N18.9, N20-N23.0, N25-N32.0, N32.3-N32.4, N34-N34.3, N36-N36.9, N39-N39.2, N41-N41.9, N44-N44.04, N45-N45.9, N49-N49.9, N60-N60.99, N65-N65.1, N72-N72.0, N75-N77.8, N80-N81.9, N83-N83.9, N84.0-N84.1, N87-N87.9, N99-N99.9, P04.3-P04.49, P70.0-P70.2, P96.0-P96.2, P96.5, Q00-Q07.9, Q10.4-Q18.9, Q20-Q28.9, Q30-Q36, Q37-Q45.9, Q50-Q87.89, Q89-Q89.8, Q90-Q93.9, Q95-Q99.8, R50.2, R50.82-R50.83, R73-R73.9, R78.0-R78.5, R95, X45-X45.9                                                                                                                                                                                                                                                                                                                                                                                                                                                                                                                                                                                                                                                                                                                                                                                                                                                                                                                                                                                                                                                                                 |

**eTable 3: GBD cause list and associated ICD9 and ICD10 codes (continued).**

| Cause                                              | Level | ICD9                                                                                                                                                                                                                                                                                                                                                                                                                                                                                                                                                                                                                                          | ICD10                                                                                                                                                                                                                                                                                                                                                                                                                                                                                                                                                                                                                                                                                   |
|----------------------------------------------------|-------|-----------------------------------------------------------------------------------------------------------------------------------------------------------------------------------------------------------------------------------------------------------------------------------------------------------------------------------------------------------------------------------------------------------------------------------------------------------------------------------------------------------------------------------------------------------------------------------------------------------------------------------------------|-----------------------------------------------------------------------------------------------------------------------------------------------------------------------------------------------------------------------------------------------------------------------------------------------------------------------------------------------------------------------------------------------------------------------------------------------------------------------------------------------------------------------------------------------------------------------------------------------------------------------------------------------------------------------------------------|
| Neoplasms                                          | 2     | 140-148.9, 150-158.9, 160-164.9, 170-175.9, 180-183.8, 184.0-184.4, 184.8, 185-186.9, 187.1-187.8, 188-188.9, 189.0-189.8, 190-194.8, 200-208.92, 209.0-209.17, 209.21-209.27, 209.31-209.57, 209.61, 209.63-209.67, 210.0-210.9, 211.0-211.8, 212.0-212.8, 213-213.9, 217-217.8, 219.0, 220-220.9, 221.0-221.8, 222.0-222.8, 223.0-223.89, 224-228.9, 229.0, 229.8, 230.1-230.8, 231.0-231.2, 232-232.9, 233.0-233.2, 233.31-233.32, 233.4-233.5, 233.7, 234.0-234.8, 235.0, 235.4, 235.6-235.8, 236.1-236.2, 236.4-236.5, 236.7, 236.91-237.3, 237.5-237.9, 238.0-238.5, 239.2-239.4, 239.6, 569.0, 569.43-569.44, 569.84-569.85, 610-610.9 | C0-C13.9, C15-C25.9, C3-C34.92, C37-C38.8, C4-C41.9, C43-C45.9, C47-C54.9, C56-C57.8, C58-C58.0, C60-C63.8, C64-C67.9, C68.0-C68.8, C69-C75.8, C81-C86.6, C88-C96.9, D00.00-D00.2, D01.0-D01.3, D02.0-D02.3, D03-D06.9, D07.0-D07.2, D07.4-D07.5, D09.0, D09.2-D09.3, D09.8, D10.0-D10.7, D11-D12.9, D13.0-D13.7, D14.0-D14.32, D15-D16.9, D22-D24.9, D26.0, D27-D27.9, D28.0-D28.1, D28.7, D29.0-D29.8, D30.0-D30.8, D31-D36, D36.1-D36.7, D37.01-D37.5, D38.0-D38.5, D39.1-D39.2, D39.8, D40.0-D40.8, D41.0-D41.8, D42-D43.9, D44.0-D44.8, D45-D45.9, D47-D47.0, D47.2-D47.9, D48.0-D48.62, D49.2-D49.4, D49.6, D49.81, K31.7, K62.0-K62.1, K63.5, N60-N60.99, N84.0-N84.1, N87-N87.9 |
| Lip and oral cavity cancer                         | 3-4   | 140-145.9, 210.0-210.6, 235.0                                                                                                                                                                                                                                                                                                                                                                                                                                                                                                                                                                                                                 | C0-C08.9, D00.00-D00.07, D10.0-D10.5, D11-D11.9, D37.01-D37.04, D37.09                                                                                                                                                                                                                                                                                                                                                                                                                                                                                                                                                                                                                  |
| Nasopharynx cancer                                 | 3-4   | 147-147.9, 210.7-210.9                                                                                                                                                                                                                                                                                                                                                                                                                                                                                                                                                                                                                        | C11-C11.9, D00.08, D10.6, D37.05                                                                                                                                                                                                                                                                                                                                                                                                                                                                                                                                                                                                                                                        |
| Other pharynx cancer                               | 3-4   | 146-146.9, 148-148.9                                                                                                                                                                                                                                                                                                                                                                                                                                                                                                                                                                                                                          | C09-C10.9, C12-C13.9, D10.7                                                                                                                                                                                                                                                                                                                                                                                                                                                                                                                                                                                                                                                             |
| Esophageal cancer                                  | 3-4   | 150-150.9, 211.0, 230.1                                                                                                                                                                                                                                                                                                                                                                                                                                                                                                                                                                                                                       | C15-C15.9, D00.1, D13.0                                                                                                                                                                                                                                                                                                                                                                                                                                                                                                                                                                                                                                                                 |
| Stomach cancer                                     | 3-4   | 151-151.9, 209.23, 209.63, 211.1, 230.2                                                                                                                                                                                                                                                                                                                                                                                                                                                                                                                                                                                                       | C16-C16.9, D00.2, D13.1, D37.1                                                                                                                                                                                                                                                                                                                                                                                                                                                                                                                                                                                                                                                          |
| Colon and rectum cancer                            | 3-4   | 153-154.9, 209.1-209.17, 209.5-209.57, 211.3-211.4, 230.3-230.6                                                                                                                                                                                                                                                                                                                                                                                                                                                                                                                                                                               | C18-C21.9, D01.0-D01.3, D12-D12.9, D37.3-D37.5                                                                                                                                                                                                                                                                                                                                                                                                                                                                                                                                                                                                                                          |
| Liver cancer                                       | 3-4   | 155-155.9, 211.5                                                                                                                                                                                                                                                                                                                                                                                                                                                                                                                                                                                                                              | C22-C22.9, D13.4                                                                                                                                                                                                                                                                                                                                                                                                                                                                                                                                                                                                                                                                        |
| Gallbladder and biliary tract cancer               | 3-4   | 156-156.9, 209.25-209.27, 209.65-209.67                                                                                                                                                                                                                                                                                                                                                                                                                                                                                                                                                                                                       | C23-C24.9, D13.5                                                                                                                                                                                                                                                                                                                                                                                                                                                                                                                                                                                                                                                                        |
| Pancreatic cancer                                  | 3-4   | 157-157.9, 211.6-211.7                                                                                                                                                                                                                                                                                                                                                                                                                                                                                                                                                                                                                        | C25-C25.9, D13.6-D13.7                                                                                                                                                                                                                                                                                                                                                                                                                                                                                                                                                                                                                                                                  |
| Larynx cancer                                      | 3-4   | 161-161.9, 212.1, 231.0, 235.6                                                                                                                                                                                                                                                                                                                                                                                                                                                                                                                                                                                                                | C32-C32.9, D02.0, D14.1, D38.0                                                                                                                                                                                                                                                                                                                                                                                                                                                                                                                                                                                                                                                          |
| Tracheal, bronchus, and lung cancer                | 3-4   | 162-162.9, 209.21, 209.61, 212.2-212.3, 231.1-231.2, 235.7                                                                                                                                                                                                                                                                                                                                                                                                                                                                                                                                                                                    | C33-C34.92, D02.1-D02.3, D14.2-D14.32, D38.1                                                                                                                                                                                                                                                                                                                                                                                                                                                                                                                                                                                                                                            |
| Malignant skin melanoma                            | 3-4   | 172-172.9                                                                                                                                                                                                                                                                                                                                                                                                                                                                                                                                                                                                                                     | C43-C43.9, D03-D03.9, D22-D23.9, D48.5                                                                                                                                                                                                                                                                                                                                                                                                                                                                                                                                                                                                                                                  |
| Non-melanoma skin cancer                           | 3     | 173-173.99, 222.4, 232-232.9, 238.2                                                                                                                                                                                                                                                                                                                                                                                                                                                                                                                                                                                                           | C44-C44.99, D04-D04.9, D49.2                                                                                                                                                                                                                                                                                                                                                                                                                                                                                                                                                                                                                                                            |
| Non-melanoma skin cancer (squamous-cell carcinoma) | 4     | 173-173.99, 222.4, 232-232.9, 238.2                                                                                                                                                                                                                                                                                                                                                                                                                                                                                                                                                                                                           | C44-C44.99, D04-D04.9, D49.2                                                                                                                                                                                                                                                                                                                                                                                                                                                                                                                                                                                                                                                            |
| Breast cancer                                      | 3-4   | 174-175.9, 217-217.8, 233.0, 238.3, 239.3, 610-610.9                                                                                                                                                                                                                                                                                                                                                                                                                                                                                                                                                                                          | C50-C50.929, D05-D05.92, D24-D24.9, D48.6-D48.62, D49.3, N60-N60.99                                                                                                                                                                                                                                                                                                                                                                                                                                                                                                                                                                                                                     |
| Cervical cancer                                    | 3-4   | 180-180.9, 219.0, 233.1                                                                                                                                                                                                                                                                                                                                                                                                                                                                                                                                                                                                                       | C53-C53.9, D06-D06.9, D26.0                                                                                                                                                                                                                                                                                                                                                                                                                                                                                                                                                                                                                                                             |
| Uterine cancer                                     | 3-4   | 182-182.8, 233.2                                                                                                                                                                                                                                                                                                                                                                                                                                                                                                                                                                                                                              | C54-C54.9, D07.0-D07.2, N87-N87.9                                                                                                                                                                                                                                                                                                                                                                                                                                                                                                                                                                                                                                                       |
| Ovarian cancer                                     | 3-4   | 183-183.0, 220-220.9, 236.2                                                                                                                                                                                                                                                                                                                                                                                                                                                                                                                                                                                                                   | C56-C56.9, D27-D27.9, D39.1-D39.12                                                                                                                                                                                                                                                                                                                                                                                                                                                                                                                                                                                                                                                      |
| Prostate cancer                                    | 3-4   | 185-185.9, 222.2, 236.5                                                                                                                                                                                                                                                                                                                                                                                                                                                                                                                                                                                                                       | C61-C61.9, D07.5, D29.1, D40.0                                                                                                                                                                                                                                                                                                                                                                                                                                                                                                                                                                                                                                                          |
| Testicular cancer                                  | 3-4   | 186-186.9, 222.0, 222.3, 236.4                                                                                                                                                                                                                                                                                                                                                                                                                                                                                                                                                                                                                | C62-C62.92, D29.2-D29.8, D40.1-D40.8                                                                                                                                                                                                                                                                                                                                                                                                                                                                                                                                                                                                                                                    |
| Kidney cancer                                      | 3-4   | 189.0-189.1, 209.24, 209.64, 223.0-223.1, 236.91                                                                                                                                                                                                                                                                                                                                                                                                                                                                                                                                                                                              | C64-C65.9, D30.0-D30.12, D41.0-D41.12                                                                                                                                                                                                                                                                                                                                                                                                                                                                                                                                                                                                                                                   |
| Bladder cancer                                     | 3-4   | 188-188.9, 223.3, 233.7, 236.7, 239.4                                                                                                                                                                                                                                                                                                                                                                                                                                                                                                                                                                                                         | C67-C67.9, D09.0, D30.3, D41.4-D41.8, D49.4                                                                                                                                                                                                                                                                                                                                                                                                                                                                                                                                                                                                                                             |
| Brain and nervous system cancer                    | 3-4   | 191-192.9                                                                                                                                                                                                                                                                                                                                                                                                                                                                                                                                                                                                                                     | C70-C72.9                                                                                                                                                                                                                                                                                                                                                                                                                                                                                                                                                                                                                                                                               |
| Thyroid cancer                                     | 3-4   | 193-193.9, 226-226.9                                                                                                                                                                                                                                                                                                                                                                                                                                                                                                                                                                                                                          | C73-C73.9, D09.3, D09.8, D34-D34.9, D44.0                                                                                                                                                                                                                                                                                                                                                                                                                                                                                                                                                                                                                                               |
| Mesothelioma                                       | 3-4   | 158.9, 163-163.9, 212.4                                                                                                                                                                                                                                                                                                                                                                                                                                                                                                                                                                                                                       | C45-C45.9                                                                                                                                                                                                                                                                                                                                                                                                                                                                                                                                                                                                                                                                               |
| Hodgkin lymphoma                                   | 3-4   | 201-201.98                                                                                                                                                                                                                                                                                                                                                                                                                                                                                                                                                                                                                                    | C81-C81.99                                                                                                                                                                                                                                                                                                                                                                                                                                                                                                                                                                                                                                                                              |
| Non-Hodgkin lymphoma                               | 3-4   | 200-200.9, 202-202.98                                                                                                                                                                                                                                                                                                                                                                                                                                                                                                                                                                                                                         | C82-C86.6, C96-C96.9                                                                                                                                                                                                                                                                                                                                                                                                                                                                                                                                                                                                                                                                    |
| Multiple myeloma                                   | 3-4   | 203-203.9                                                                                                                                                                                                                                                                                                                                                                                                                                                                                                                                                                                                                                     | C88-C90.9                                                                                                                                                                                                                                                                                                                                                                                                                                                                                                                                                                                                                                                                               |
| Leukemia                                           | 3     | 204-208.92                                                                                                                                                                                                                                                                                                                                                                                                                                                                                                                                                                                                                                    | C91-C95.92                                                                                                                                                                                                                                                                                                                                                                                                                                                                                                                                                                                                                                                                              |
| Acute lymphoid leukemia                            | 4     | 204.0-204.02                                                                                                                                                                                                                                                                                                                                                                                                                                                                                                                                                                                                                                  | C91.0-C91.02                                                                                                                                                                                                                                                                                                                                                                                                                                                                                                                                                                                                                                                                            |
| Chronic lymphoid leukemia                          | 4     | 204.1-204.12                                                                                                                                                                                                                                                                                                                                                                                                                                                                                                                                                                                                                                  | C91.1-C91.12                                                                                                                                                                                                                                                                                                                                                                                                                                                                                                                                                                                                                                                                            |
| Acute myeloid leukemia                             | 4     | 205.0-205.02, 205.3-205.32, 206.0-206.02, 207.0                                                                                                                                                                                                                                                                                                                                                                                                                                                                                                                                                                                               | C92.0-C92.02, C92.3-C92.62, C93.0-C93.02, C94.0-C94.02, C94.2-C94.22, C94.4-C94.5                                                                                                                                                                                                                                                                                                                                                                                                                                                                                                                                                                                                       |
| Chronic myeloid leukemia                           | 4     | 205.1-205.12, 206.1-206.12, 207.1                                                                                                                                                                                                                                                                                                                                                                                                                                                                                                                                                                                                             | C92.1-C92.12                                                                                                                                                                                                                                                                                                                                                                                                                                                                                                                                                                                                                                                                            |

**eTable 3: GBD cause list and associated ICD9 and ICD10 codes (continued).**

| Cause                                               | Level | ICD9                                                                                                                                                                                                                                                                                                                                                                                                                                                                                                              | ICD10                                                                                                                                                                                                                                                                                                                                                                                                                                                                        |
|-----------------------------------------------------|-------|-------------------------------------------------------------------------------------------------------------------------------------------------------------------------------------------------------------------------------------------------------------------------------------------------------------------------------------------------------------------------------------------------------------------------------------------------------------------------------------------------------------------|------------------------------------------------------------------------------------------------------------------------------------------------------------------------------------------------------------------------------------------------------------------------------------------------------------------------------------------------------------------------------------------------------------------------------------------------------------------------------|
| Other neoplasms                                     | 3-4   | 152-152.9, 158-158.8, 160-160.9, 164-164.9, 170-171.9, 181-181.9, 182.9, 183.2-183.8, 184.0-184.4, 184.8, 187.1-187.8, 189.2-189.8, 190-190.9, 194-194.8, 209.0-209.03, 209.22, 209.31-209.43, 211.2, 211.8, 212.0, 212.5-212.8, 213-213.9, 221.0-221.8, 222.1, 222.8, 223.2, 223.8-223.89, 224-225.9, 227-228.9, 229.0, 229.8, 230.7-230.8, 233.31-233.32, 233.4-233.5, 234.0-234.8, 235.4, 235.8, 236.1, 236.99-237.3, 237.5-237.9, 238.0-238.1, 238.4-238.5, 239.2, 239.6, 569.0, 569.43-569.44, 569.84-569.85 | C17-C17.9, C3-C31.9, C37-C38.8, C4-C41.9, C47-C5, C51-C52.9, C57-C57.8, C58-C58.0, C60-C60.9, C63-C63.8, C66-C66.9, C68.0-C68.8, C69-C7, C74-C75.8, D07.4, D09.2-D09.22, D13.2-D13.39, D14.0, D15-D16.9, D28.0-D28.1, D28.7, D29.0, D30.2-D30.22, D30.4-D30.8, D31-D33.9, D35-D36, D36.1-D36.7, D37.2, D38.2-D38.5, D39.2, D39.8, D41.2-D41.3, D42-D43.9, D44.1-D44.8, D45-D45.9, D47-D47.0, D47.2-D47.9, D48.0-D48.4, D49.6, D49.81, K31.7, K62.0-K62.1, K63.5, N84.0-N84.1 |
| Cardiovascular diseases                             | 2     | 036.41-036.43, 036.6, 074.2, 074.21-074.23, 391-391.9, 392.0, 393-398.99, 402-402.91, 410-414.9, 417-417.9, 420-423, 423.1-425.9, 427-427.32, 427.6-427.89, 429.0-429.1, 430-435.9, 437.0-437.2, 437.5-437.8, 441-443.9, 447-454.9, 456, 456.3-457.9, 459, 459.1-459.39                                                                                                                                                                                                                                           | A39.5-A39.53, B33.2-B33.24, D86.85, G45-G46.8, I01-I01.9, I02.0, I05-I09.9, I11-I11.9, I20-I25.9, I28-I28.8, I30-I31.1, I31.8-I43.9, I47-I48.92, I51.0-I51.5, I60-I61.9, I62.0-I62.03, I63-I63.9, I65-I66.9, I67.0-I67.3, I67.5-I67.6, I68.0-I68.2, I69.0-I69.398, I70.2-I70.799, I71-I73.9, I77-I83.93, I86-I89.9, I91.9, I98                                                                                                                                               |
| Rheumatic heart disease                             | 3-4   | 391-391.9, 392.0, 393-398.99                                                                                                                                                                                                                                                                                                                                                                                                                                                                                      | I01-I01.9, I02.0, I05-I09.9                                                                                                                                                                                                                                                                                                                                                                                                                                                  |
| Ischemic heart disease                              | 3-4   | 410-414.9                                                                                                                                                                                                                                                                                                                                                                                                                                                                                                         | I20-I25.9                                                                                                                                                                                                                                                                                                                                                                                                                                                                    |
| Cerebrovascular disease                             | 3     | 430-435.9, 437.0-437.2, 437.5-437.8                                                                                                                                                                                                                                                                                                                                                                                                                                                                               | G45-G46.8, I60-I61.9, I62.0-I62.03, I63-I63.9, I65-I66.9, I67.0-I67.3, I67.5-I67.6, I68.1-I68.2, I69.0-I69.398                                                                                                                                                                                                                                                                                                                                                               |
| Ischemic stroke                                     | 4     | 433-435.9, 437.0-437.1, 437.5-437.8                                                                                                                                                                                                                                                                                                                                                                                                                                                                               | G45-G46.8, I63-I63.9, I65-I66.9, I67.2-I67.3, I67.5-I67.6, I69.3-I69.398                                                                                                                                                                                                                                                                                                                                                                                                     |
| Hemorrhagic stroke                                  | 4     | 430-432.9, 437.2                                                                                                                                                                                                                                                                                                                                                                                                                                                                                                  | I60-I61.9, I62.0-I62.03, I67.0-I67.1, I68.1-I68.2, I69.0-I69.298                                                                                                                                                                                                                                                                                                                                                                                                             |
| Hypertensive heart disease                          | 3-4   | 402-402.91                                                                                                                                                                                                                                                                                                                                                                                                                                                                                                        | I11-I11.9                                                                                                                                                                                                                                                                                                                                                                                                                                                                    |
| Cardiomyopathy and myocarditis                      | 3-4   | 036.43, 036.6, 074.23, 422-422.99, 425-425.9, 429.0-429.1                                                                                                                                                                                                                                                                                                                                                                                                                                                         | A39.52, B33.2-B33.24, D86.85, I40-I43.9, I51.4-I51.5                                                                                                                                                                                                                                                                                                                                                                                                                         |
| Atrial fibrillation and flutter                     | 3-4   | 427.3-427.32                                                                                                                                                                                                                                                                                                                                                                                                                                                                                                      | I48-I48.92                                                                                                                                                                                                                                                                                                                                                                                                                                                                   |
| Aortic aneurysm                                     | 3-4   | 441-441.9                                                                                                                                                                                                                                                                                                                                                                                                                                                                                                         | I71-I71.9                                                                                                                                                                                                                                                                                                                                                                                                                                                                    |
| Peripheral arterial disease                         | 3-4   | 443.0-443.9                                                                                                                                                                                                                                                                                                                                                                                                                                                                                                       | I70.2-I70.799, I73-I73.9                                                                                                                                                                                                                                                                                                                                                                                                                                                     |
| Endocarditis                                        | 3-4   | 036.42, 074.22, 421-421.9, 424.9-424.91                                                                                                                                                                                                                                                                                                                                                                                                                                                                           | A39.51, I33-I33.9, I38-I39.9                                                                                                                                                                                                                                                                                                                                                                                                                                                 |
| Other cardiovascular and circulatory diseases       | 3-4   | 036.41, 074.2, 074.21, 417-417.9, 420-420.99, 423, 423.1-424.8, 424.99, 427-427.2, 427.6-427.89, 442-443, 447-454.9, 456, 456.3-457.9, 459, 459.1-459.39                                                                                                                                                                                                                                                                                                                                                          | A39.5-A39.50, A39.53, I28-I28.8, I30-I31.1, I31.8-I32.8, I34-I37.9, I47-I47.9, I51.0-I51.3, I68.0, I72-I72.9, I77-I83.93, I86-I89.9, I91.9, I98                                                                                                                                                                                                                                                                                                                              |
| Chronic respiratory diseases                        | 2     | 135-135.9, 136.6, 327.2-327.8, 470, 470.9-474.9, 476-476.1, 477-479, 490-504.9, 506-506.9, 508-509, 515, 516-517.8, 518.6, 518.9, 519.1-519.4, 780.57, 786.03                                                                                                                                                                                                                                                                                                                                                     | D86-D86.2, D86.89-D86.9, G47.3-G47.39, J30-J35.9, J37-J47.9, J60-J63.8, J65-J68.9, J70-J70.1, J70.8-J70.9, J82, J84-J84.9, J91-J92.9                                                                                                                                                                                                                                                                                                                                         |
| Chronic obstructive pulmonary disease               | 3-4   | 490-492.9, 494-494.9, 496-499                                                                                                                                                                                                                                                                                                                                                                                                                                                                                     | J40-J44.9, J47-J47.9                                                                                                                                                                                                                                                                                                                                                                                                                                                         |
| Pneumoconiosis                                      | 3     | 500-504.9                                                                                                                                                                                                                                                                                                                                                                                                                                                                                                         | J60-J63.8, J65-J65.0, J92.0                                                                                                                                                                                                                                                                                                                                                                                                                                                  |
| Silicosis                                           | 4     | 502-502.9, 503.0, 503.9                                                                                                                                                                                                                                                                                                                                                                                                                                                                                           | J62-J62.9                                                                                                                                                                                                                                                                                                                                                                                                                                                                    |
| Asbestosis                                          | 4     | 501                                                                                                                                                                                                                                                                                                                                                                                                                                                                                                               | J61-J61.0, J92.0                                                                                                                                                                                                                                                                                                                                                                                                                                                             |
| Coal workers pneumoconiosis                         | 4     | 500-500.9, 501.0-501.9                                                                                                                                                                                                                                                                                                                                                                                                                                                                                            | J60-J60.0                                                                                                                                                                                                                                                                                                                                                                                                                                                                    |
| Other pneumoconiosis                                | 4     | 503, 503.1, 504-504.9                                                                                                                                                                                                                                                                                                                                                                                                                                                                                             | J63-J63.8, J65-J65.0                                                                                                                                                                                                                                                                                                                                                                                                                                                         |
| Asthma                                              | 3-4   | 493-493.92                                                                                                                                                                                                                                                                                                                                                                                                                                                                                                        | J45-J46.9                                                                                                                                                                                                                                                                                                                                                                                                                                                                    |
| Interstitial lung disease and pulmonary sarcoidosis | 3-4   | 135-135.9, 136.6, 515, 516-516.9                                                                                                                                                                                                                                                                                                                                                                                                                                                                                  | D86-D86.2, D86.89-D86.9, J84-J84.9                                                                                                                                                                                                                                                                                                                                                                                                                                           |
| Other chronic respiratory diseases                  | 3-4   | 327.2-327.8, 470, 470.9-474.9, 476-476.1, 477-479, 495-495.9, 506-506.9, 508-509, 517-517.8, 518.6, 518.9, 519.1-519.4, 780.57, 786.03                                                                                                                                                                                                                                                                                                                                                                            | G47.3-G47.39, J30-J35.9, J37-J39.9, J66-J68.9, J70-J70.1, J70.8-J70.9, J82, J91-J92, J92.9                                                                                                                                                                                                                                                                                                                                                                                   |
| Cirrhosis and other chronic liver diseases          | 2-4   | 070.22-070.23, 070.32-070.33, 070.44, 070.54, 456.0-456.21, 571-571.9, 572.3-572.9, 573.0-573.3, 573.8-573.9                                                                                                                                                                                                                                                                                                                                                                                                      | B18-B18.9, I85-I85.9, I98.2, K70-K70.9, K71.3-K71.51, K71.7, K72.1-K74.69, K74.9, K75.8-K76.0, K76.6-K76.7, K76.9                                                                                                                                                                                                                                                                                                                                                            |

**eTable 3: GBD cause list and associated ICD9 and ICD10 codes (continued).**

| Cause                                      | Level | ICD9                                                                                                                                                                                                                                                                      | ICD10                                                                                                                                                                                                                                                                    |
|--------------------------------------------|-------|---------------------------------------------------------------------------------------------------------------------------------------------------------------------------------------------------------------------------------------------------------------------------|--------------------------------------------------------------------------------------------------------------------------------------------------------------------------------------------------------------------------------------------------------------------------|
| Digestive diseases                         | 2     | 455-455.9, 530-536.1, 537-537.6, 537.8-537.84, 538, 540-543.9, 550-551.1, 551.3-552.1, 552.3-553.6, 555-558.9, 560-560.39, 560.8-560.9, 562-562.13, 564-564.1, 564.5-564.7, 565-566.9, 569.1-569.42, 569.5, 569.7-569.71, 573.4, 574-577.9, 579-579.2, 579.4-579.9, 787.1 | I84-I84.9, K20-K29.91, K31-K31.6, K31.8-K31.89, K35-K38.9, K40-K42.9, K44-K46.9, K50-K52.9, K55-K62, K62.2-K62.6, K62.8-K62.9, K64-K64.9, K66.8, K67, K68-K68.9, K75.2-K75.4, K76.1-K76.5, K76.8-K76.89, K77-K77.8, K80-K83.9, K85-K86.9, K90-K90.9, K92.8-K92.89, M09.1 |
| Peptic ulcer disease                       | 3-4   | 531-534.91                                                                                                                                                                                                                                                                | K25-K28.9, K31, K31.1-K31.6, K31.8, K31.82-K31.89                                                                                                                                                                                                                        |
| Gastritis and duodenitis                   | 3-4   | 535-535.9                                                                                                                                                                                                                                                                 | K29-K29.91                                                                                                                                                                                                                                                               |
| Appendicitis                               | 3-4   | 540-542.9                                                                                                                                                                                                                                                                 | K35-K37.9, K38.3-K38.9                                                                                                                                                                                                                                                   |
| Paralytic ileus and intestinal obstruction | 3-4   | 560-560.39, 560.8-560.9                                                                                                                                                                                                                                                   | K56-K56.9                                                                                                                                                                                                                                                                |
| Inguinal, femoral, and abdominal hernia    | 3-4   | 550-551.1, 551.3-552.1, 552.3-553.03, 553.6                                                                                                                                                                                                                               | K40-K42.9, K44-K46.9                                                                                                                                                                                                                                                     |
| Inflammatory bowel disease                 | 3-4   | 555-556.9, 558-558.9, 569.5                                                                                                                                                                                                                                               | K50-K52.9, M09.1                                                                                                                                                                                                                                                         |
| Vascular intestinal disorders              | 3-4   | 557-557.9                                                                                                                                                                                                                                                                 | K55-K55.9                                                                                                                                                                                                                                                                |
| Gallbladder and biliary diseases           | 3-4   | 574-576.9                                                                                                                                                                                                                                                                 | K80-K83.9                                                                                                                                                                                                                                                                |
| Pancreatitis                               | 3-4   | 577-577.9, 579.4                                                                                                                                                                                                                                                          | K85-K86.9                                                                                                                                                                                                                                                                |
| Other digestive diseases                   | 3-4   | 455-455.9, 530-530.9, 536-536.1, 537-537.6, 537.8-537.84, 538, 543-543.9, 553.1-553.3, 562-562.13, 564-564.1, 564.5-564.7, 565-566.9, 569.1-569.42, 569.7-569.71, 573.4, 579-579.2, 579.8-579.9, 787.1                                                                    | I84-I84.9, K20-K24, K31.0, K31.81-K31.819, K38-K38.2, K57-K62, K62.2-K62.6, K62.8-K62.9, K64-K64.9, K66.8, K67, K68-K68.9, K75.2-K75.4, K76.1-K76.5, K76.8-K76.89, K77-K77.8, K90-K90.9, K92.8-K92.89                                                                    |
| Neurological disorders                     | 2     | 290-290.9, 294.1-294.9, 330-331.2, 331.5-337.9, 340-341.9, 345-345.91, 349, 349.2-349.8, 353.6-353.9, 356-356.9, 357.0-357.1, 357.3-357.4, 357.7, 358-359.9, 728.86, 728.88, 775.2                                                                                        | F00-F03.91, G10-G13.8, G20-G21.0, G21.2-G24, G24.1-G25.0, G25.2-G25.3, G25.5, G25.8-G26.0, G30-G31.1, G31.8-G31.9, G35-G37.9, G40-G41.9, G61-G61.9, G70-G72, G72.2-G73.7, G90-G90.9, G95-G95.9, M33-M33.99                                                               |
| Alzheimer disease and other dementias      | 3-4   | 290-290.9, 294.1-294.9, 331-331.2                                                                                                                                                                                                                                         | F00-F03.91, G30-G31.1, G31.8-G31.9                                                                                                                                                                                                                                       |
| Parkinson disease                          | 3-4   | 332-332.9                                                                                                                                                                                                                                                                 | G20-G21.0, G21.2-G22.0                                                                                                                                                                                                                                                   |
| Epilepsy                                   | 3-4   | 345-345.91                                                                                                                                                                                                                                                                | G40-G41.9                                                                                                                                                                                                                                                                |
| Multiple sclerosis                         | 3-4   | 340-340.9                                                                                                                                                                                                                                                                 | G35-G35.9                                                                                                                                                                                                                                                                |
| Motor neuron disease                       | 3-4   | 335-335.29, 335.8-335.9                                                                                                                                                                                                                                                   | G12.2-G12.9                                                                                                                                                                                                                                                              |
| Other neurological disorders               | 3-4   | 330-330.9, 331.5-331.9, 333-334.9, 335.3, 336-337.9, 341-341.9, 349, 349.2-349.8, 353.6-353.9, 356-356.9, 357.0-357.1, 357.3-357.4, 357.7, 358-359.9, 728.86, 728.88, 775.2                                                                                               | G10-G12.1, G13-G13.8, G23-G24, G24.1-G25.0, G25.2-G25.3, G25.5, G25.8-G26.0, G36-G37.9, G61-G61.9, G70-G72, G72.2-G73.7, G90-G90.9, G95-G95.9, M33-M33.99                                                                                                                |
| Mental and substance use disorders         | 2     | 291-292.9, 295-295.95, 303-303.93, 304.0-304.83, 305-305.93, 307.1, 307.51, 307.54, 357.5, 760.7-760.79, 780.59, 790.3, E850-E850.29, E850.9-E854.39, E860-E860.19                                                                                                        | F06.2, F10-F16.99, F18-F29.9, F50.0-F50.5, G31.2, G72.1, P04.3-P04.49, P96.1, Q86.0, R78.0-R78.5, X45-X45.9                                                                                                                                                              |
| Schizophrenia                              | 3-4   | 295-295.95                                                                                                                                                                                                                                                                | F06.2, F20-F23.9, F25-F29.9                                                                                                                                                                                                                                              |
| Alcohol use disorders                      | 3-4   | 291-291.9, 303-303.93, 305.0-305.03, 357.5, 790.3, E860-E860.19                                                                                                                                                                                                           | F10-F10.99, G31.2, G72.1, P04.3, Q86.0, R78.0, X45-X45.9                                                                                                                                                                                                                 |
| Drug use disorders                         | 3     | 292-292.9, 304.0-304.83, 305, 305.1-305.93, 760.7-760.79, E850-E850.29, E850.9-E854.39                                                                                                                                                                                    | F11-F16.99, F18-F19.99, P04.4-P04.49, P96.1, R78.1-R78.5                                                                                                                                                                                                                 |
| Opioid use disorders                       | 4     | 304.0-304.03, 305.5-305.53, E850.0-E850.29                                                                                                                                                                                                                                | F11-F11.99, P96.1, R78.1                                                                                                                                                                                                                                                 |
| Cocaine use disorders                      | 4     | 304.2-304.23, 305.6-305.63                                                                                                                                                                                                                                                | F14-F14.99, R78.2                                                                                                                                                                                                                                                        |
| Amphetamine use disorders                  | 4     | 304.4-304.43, 305.7-305.73                                                                                                                                                                                                                                                | F15-F15.99                                                                                                                                                                                                                                                               |
| Other drug use disorders                   | 4     | 292-292.9, 304.1-304.13, 304.5-304.83, 305, 305.1-305.13, 305.3-305.43, 305.8-305.93                                                                                                                                                                                      | F13-F13.99, F16-F16.99, F18-F19.99, R78.3-R78.5                                                                                                                                                                                                                          |
| Eating disorders                           | 3     | 307.1, 307.51, 307.54                                                                                                                                                                                                                                                     | F50.0-F50.5                                                                                                                                                                                                                                                              |
| Anorexia nervosa                           | 4     | 307.1, 307.54                                                                                                                                                                                                                                                             | F50.0-F50.1                                                                                                                                                                                                                                                              |
| Bulimia nervosa                            | 4     | 307.51                                                                                                                                                                                                                                                                    | F50.2-F50.5                                                                                                                                                                                                                                                              |



**eTable 3: GBD cause list and associated ICD9 and ICD10 codes (continued).**

| Cause                                               | Level | ICD9                                                                                                                                                                                                                                                                                                                                                                                                                                                                                                                                                                               | ICD10                                                                                                                                                                                                                                                                                                                                                                                                                                                                                                                                                                                                                                                                                                                                                                                                              |
|-----------------------------------------------------|-------|------------------------------------------------------------------------------------------------------------------------------------------------------------------------------------------------------------------------------------------------------------------------------------------------------------------------------------------------------------------------------------------------------------------------------------------------------------------------------------------------------------------------------------------------------------------------------------|--------------------------------------------------------------------------------------------------------------------------------------------------------------------------------------------------------------------------------------------------------------------------------------------------------------------------------------------------------------------------------------------------------------------------------------------------------------------------------------------------------------------------------------------------------------------------------------------------------------------------------------------------------------------------------------------------------------------------------------------------------------------------------------------------------------------|
| Diabetes, urogenital, blood, and endocrine diseases | 2     | 218-219, 219.1-219.9, 236.0, 240-243.9, 244.0-244.1, 244.3-244.8, 245-246.9, 250-259.9, 270-273.9, 275-276, 277-277.2, 277.4-277.9, 278.0-278.8, 282-284.9, 286-286.5, 286.7-289.7, 349.0-349.1, 357.2, 357.6, 403-404.93, 518.7, 519.0-519.09, 536.4-536.49, 539-539.9, 551.2-551.29, 552.2-552.29, 564.2-564.4, 569.6-569.69, 579.3, 580-583.9, 585-585.9, 588-590.9, 592-593.89, 594-599.69, 599.8-599.89, 601-602.9, 604-604.99, 608.2-608.24, 617-618.9, 620-620.9, 621.4-621.9, 622.3-622.7, 629-629.81, 775.0-775.1, 775.3, 779.4-779.5, 780.62-780.63, 788.0, 790.2-790.22 | D25-D26, D26.1-D26.9, D28.2, D52.1, D55-D58.9, D59.0-D59.3, D59.5-D59.6, D60-D61.9, D63.1, D64.0, D64.4, D66-D67, D68.0-D69.8, D70-D75.89, D76-D78.89, D86.8, D86.82-D86.84, D86.86-D86.87, D89-D89.3, E03-E07.1, E09-E14.9, E15.0, E16.0-E16.9, E20-E34.8, E36-E36.8, E65-E68, E70-E85.29, E87.71, E88-E89.9, G21.1-G21.19, G24.0-G24.09, G25.1, G25.4, G25.6-G25.79, G72.0, G93.7, G97-G97.9, I12-I13.9, I95.2-I95.3, I97-I97.9, I98.9, J70.2-J70.5, J95-J95.9, K43-K43.9, K62.7, K91-K91.9, K94-K95.89, M87.1-M87.19, N00-N08.8, N10-N12.9, N14-N16.8, N18-N18.9, N20-N23.0, N25-N32.0, N32.3-N32.4, N34-N34.3, N36-N36.9, N39-N39.2, N41-N41.9, N44-N44.04, N45-N45.9, N49-N49.9, N65-N65.1, N72-N72.0, N75-N77.8, N80-N81.9, N83-N83.9, N99-N99.9, P70.0-P70.2, P96.2, P96.5, R50.2, R50.82-R50.83, R73-R73.9 |
| Diabetes mellitus                                   | 3-4   | 250-250.39, 250.5-250.99, 357.2, 775.0-775.1, 790.2-790.22                                                                                                                                                                                                                                                                                                                                                                                                                                                                                                                         | E10-E10.11, E10.3-E11.1, E11.3-E12.1, E12.3-E13.11, E13.3-E14.1, E14.3-E14.9, P70.0-P70.2, R73-R73.9                                                                                                                                                                                                                                                                                                                                                                                                                                                                                                                                                                                                                                                                                                               |
| Acute glomerulonephritis                            | 3-4   | 580-580.9                                                                                                                                                                                                                                                                                                                                                                                                                                                                                                                                                                          | N00-N01.9                                                                                                                                                                                                                                                                                                                                                                                                                                                                                                                                                                                                                                                                                                                                                                                                          |
| Chronic kidney disease                              | 3     | 250.4-250.49, 403-404.93, 581-583.9, 585-585.9, 589-589.9                                                                                                                                                                                                                                                                                                                                                                                                                                                                                                                          | D63.1, E10.2-E10.29, E11.2-E11.29, E12.2, E13.2-E13.29, E14.2, I12-I13.9, N02-N08.8, N15.0, N18-N18.9                                                                                                                                                                                                                                                                                                                                                                                                                                                                                                                                                                                                                                                                                                              |
| Chronic kidney disease due to diabetes mellitus     | 4     | 250.4-250.49                                                                                                                                                                                                                                                                                                                                                                                                                                                                                                                                                                       | E10.2-E10.29, E11.2-E11.29, E12.2, E13.2-E13.29, E14.2                                                                                                                                                                                                                                                                                                                                                                                                                                                                                                                                                                                                                                                                                                                                                             |
| Chronic kidney disease due to hypertension          | 4     | 403-404.93                                                                                                                                                                                                                                                                                                                                                                                                                                                                                                                                                                         | I12-I13.9                                                                                                                                                                                                                                                                                                                                                                                                                                                                                                                                                                                                                                                                                                                                                                                                          |
| Chronic kidney disease due to glomerulonephritis    | 4     | 581-583.9                                                                                                                                                                                                                                                                                                                                                                                                                                                                                                                                                                          | N03-N06.9                                                                                                                                                                                                                                                                                                                                                                                                                                                                                                                                                                                                                                                                                                                                                                                                          |
| Chronic kidney disease due to other causes          | 4     | 589-589.9                                                                                                                                                                                                                                                                                                                                                                                                                                                                                                                                                                          | N02-N02.9, N07-N08.8, N15.0                                                                                                                                                                                                                                                                                                                                                                                                                                                                                                                                                                                                                                                                                                                                                                                        |
| Urinary diseases and male infertility               | 3     | 588-588.9, 590-590.9, 592-593.89, 594-596.81, 596.89-598.1, 598.8-599.69, 599.8-599.89, 601-602.9, 604-604.99, 608.2-608.24, 788.0                                                                                                                                                                                                                                                                                                                                                                                                                                                 | N10-N12.9, N15, N15.1-N16.8, N20-N23.0, N25-N32.0, N32.3-N32.4, N34-N34.3, N36-N36.9, N39-N39.2, N41-N41.9, N44-N44.04, N45-N45.9, N49-N49.9                                                                                                                                                                                                                                                                                                                                                                                                                                                                                                                                                                                                                                                                       |
| Interstitial nephritis and urinary tract infections | 4     | 590-590.9, 595-595.9, 597-597.9, 599.0                                                                                                                                                                                                                                                                                                                                                                                                                                                                                                                                             | N10-N12.9, N15, N15.1-N16.8, N30-N30.91, N34-N34.3, N39.0-N39.2                                                                                                                                                                                                                                                                                                                                                                                                                                                                                                                                                                                                                                                                                                                                                    |
| Urolithiasis                                        | 4     | 592-592.9, 594-594.9, 788.0                                                                                                                                                                                                                                                                                                                                                                                                                                                                                                                                                        | N20-N23.0                                                                                                                                                                                                                                                                                                                                                                                                                                                                                                                                                                                                                                                                                                                                                                                                          |
| Other urinary diseases                              | 4     | 588-588.9, 593-593.89, 596-596.81, 596.89-596.9, 598-598.1, 598.8-599, 599.1-599.69, 599.8-599.89, 601-602.9, 604-604.99, 608.2-608.24                                                                                                                                                                                                                                                                                                                                                                                                                                             | N25-N29.8, N31-N32.0, N32.3-N32.4, N36-N36.9, N39, N41-N41.9, N44-N44.04, N45-N45.9, N49-N49.9                                                                                                                                                                                                                                                                                                                                                                                                                                                                                                                                                                                                                                                                                                                     |
| Gynecological diseases                              | 3     | 218-219, 219.1-219.9, 236.0, 256.4, 617-618.9, 620-620.9, 621.4-621.9, 622.3-622.7, 629-629.81                                                                                                                                                                                                                                                                                                                                                                                                                                                                                     | D25-D26, D26.1-D26.9, D28.2, E28.2, N72-N72.0, N75-N77.8, N80-N81.9, N83-N83.9                                                                                                                                                                                                                                                                                                                                                                                                                                                                                                                                                                                                                                                                                                                                     |
| Uterine fibroids                                    | 4     | 218-219, 219.1-219.9, 236.0                                                                                                                                                                                                                                                                                                                                                                                                                                                                                                                                                        | D25-D26, D26.1-D26.9, D28.2                                                                                                                                                                                                                                                                                                                                                                                                                                                                                                                                                                                                                                                                                                                                                                                        |
| Polycystic ovarian syndrome                         | 4     | 256.4                                                                                                                                                                                                                                                                                                                                                                                                                                                                                                                                                                              | E28.2                                                                                                                                                                                                                                                                                                                                                                                                                                                                                                                                                                                                                                                                                                                                                                                                              |
| Endometriosis                                       | 4     | 617-617.9                                                                                                                                                                                                                                                                                                                                                                                                                                                                                                                                                                          | N80-N80.9                                                                                                                                                                                                                                                                                                                                                                                                                                                                                                                                                                                                                                                                                                                                                                                                          |
| Genital prolapse                                    | 4     | 618-618.9                                                                                                                                                                                                                                                                                                                                                                                                                                                                                                                                                                          | N81-N81.9                                                                                                                                                                                                                                                                                                                                                                                                                                                                                                                                                                                                                                                                                                                                                                                                          |
| Other gynecological diseases                        | 4     | 620-620.9, 621.4-621.9, 622.3-622.7, 629-629.81                                                                                                                                                                                                                                                                                                                                                                                                                                                                                                                                    | N72-N72.0, N75-N77.8, N83-N83.9                                                                                                                                                                                                                                                                                                                                                                                                                                                                                                                                                                                                                                                                                                                                                                                    |
| Hemoglobinopathies and hemolytic anemias            | 3     | 282-284.9                                                                                                                                                                                                                                                                                                                                                                                                                                                                                                                                                                          | D55-D58.9, D59.1, D59.3, D59.5, D60-D61.9, D64.0, D64.4                                                                                                                                                                                                                                                                                                                                                                                                                                                                                                                                                                                                                                                                                                                                                            |
| Thalassemias                                        | 4     | 282.4-282.49                                                                                                                                                                                                                                                                                                                                                                                                                                                                                                                                                                       | D56-D56.9                                                                                                                                                                                                                                                                                                                                                                                                                                                                                                                                                                                                                                                                                                                                                                                                          |
| Sickle cell disorders                               | 4     | 282.6-282.68                                                                                                                                                                                                                                                                                                                                                                                                                                                                                                                                                                       | D57-D57.219, D57.4-D57.819                                                                                                                                                                                                                                                                                                                                                                                                                                                                                                                                                                                                                                                                                                                                                                                         |
| G6PD deficiency                                     | 4     | 282.2-282.3                                                                                                                                                                                                                                                                                                                                                                                                                                                                                                                                                                        | D55-D55.2                                                                                                                                                                                                                                                                                                                                                                                                                                                                                                                                                                                                                                                                                                                                                                                                          |
| Other hemoglobinopathies and hemolytic anemias      | 4     | 282-282.1, 282.69-284.9                                                                                                                                                                                                                                                                                                                                                                                                                                                                                                                                                            | D55.3-D55.9, D58-D58.9, D59.1, D59.3, D59.5, D60-D61.9, D64.0, D64.4                                                                                                                                                                                                                                                                                                                                                                                                                                                                                                                                                                                                                                                                                                                                               |

**eTable 3: GBD cause list and associated ICD9 and ICD10 codes (continued).**

| Cause                                             | Level | ICD9                                                                                                                                                                                                                                                                                                                                              | ICD10                                                                                                                                                                                                                                                                                                                                                                                                                                                                                                             |
|---------------------------------------------------|-------|---------------------------------------------------------------------------------------------------------------------------------------------------------------------------------------------------------------------------------------------------------------------------------------------------------------------------------------------------|-------------------------------------------------------------------------------------------------------------------------------------------------------------------------------------------------------------------------------------------------------------------------------------------------------------------------------------------------------------------------------------------------------------------------------------------------------------------------------------------------------------------|
| Endocrine, metabolic, blood, and immune disorders | 3-4   | 240-243.9, 244.0-244.1, 244.3-244.8, 245-246.9, 251-256.39, 256.8-259.9, 270-273.9, 275-276, 277-277.2, 277.4-277.9, 278.0-278.8, 286-286.5, 286.7-289.7, 349.0-349.1, 357.6, 518.7, 519.0-519.09, 536.4-536.49, 539-539.9, 551.2-551.29, 552.2-552.29, 564.2-564.4, 569.6-569.69, 579.3, 596.82-596.83, 598.2, 775.3, 779.4-779.5, 780.62-780.63 | D52.1, D59.0, D59.2, D59.6, D66-D67, D68.0-D69.8, D70-D75.89, D76-D78.89, D86.8, D86.82-D86.84, D86.86-D86.87, D89-D89.3, E03-E07.1, E09-E09.9, E15.0, E16.0-E16.9, E20-E28.1, E28.3-E34.8, E36-E36.8, E65-E68, E70-E85.29, E87.71, E88-E89.9, G21.1-G21.19, G24.0-G24.09, G25.1, G25.4, G25.6-G25.79, G72.0, G93.7, G97-G97.9, I95.2-I95.3, I97-I97.9, I98.9, J70.2-J70.5, J95-J95.9, K43-K43.9, K62.7, K91-K91.9, K94-K95.89, M87.1-M87.19, N14-N14.4, N65-N65.1, N99-N99.9, P96.2, P96.5, R50.2, R50.82-R50.83 |
| Musculoskeletal disorders                         | 2     | 416.1, 437.4, 446-446.9, 695.4-695.59, 710-711.99, 714-714.33, 714.8-714.9, 730.1-730.19, 732-732.9, 733.0-733.19                                                                                                                                                                                                                                 | I27.1, I67.7, L93-L93.2, M00-M03.0, M03.2-M03.6, M05-M09.0, M09.2-M09.8, M30-M32.9, M34-M36.8, M40-M43.19, M65-M65.08, M71.0-M71.19, M80-M82.8, M86.3-M86.49, M87-M87.09, M88-M89.09, M89.5-M89.59, M89.7-M89.9                                                                                                                                                                                                                                                                                                   |
| Rheumatoid arthritis                              | 3-4   | 714-714.33, 714.8-714.9                                                                                                                                                                                                                                                                                                                           | M05-M06.9, M08.0-M08.89                                                                                                                                                                                                                                                                                                                                                                                                                                                                                           |
| Other musculoskeletal disorders                   | 3-4   | 416.1, 437.4, 446-446.9, 695.4-695.59, 710-711.99, 730.1-730.19, 732-732.9, 733.0-733.19                                                                                                                                                                                                                                                          | I27.1, I67.7, L93-L93.2, M00-M03.0, M03.2-M03.6, M07-M08, M08.9-M09.0, M09.2-M09.8, M30-M32.9, M34-M36.8, M40-M43.19, M65-M65.08, M71.0-M71.19, M80-M82.8, M86.3-M86.49, M87-M87.09, M88-M89.09, M89.5-M89.59, M89.7-M89.9                                                                                                                                                                                                                                                                                        |
| Other non-communicable diseases                   | 2     | 035-035.9, 102-103.9, 133-133.6, 376.0-376.1, 680-689, 694-695.3, 707-707.9, 740-749.04, 749.2-758.9, 759.0-759.89, 798-798.0                                                                                                                                                                                                                     | A46-A46.0, A66-A67.9, B86, D86.3, H05.0-H05.119, L00-L05.92, L08-L08.9, L10-L14.0, L51-L51.9, L88-L89.95, L97-L98.499, P96.0, Q00-Q07.9, Q10.4-Q18.9, Q20-Q28.9, Q30-Q36, Q37-Q45.9, Q50-Q86, Q86.1-Q87.89, Q89-Q89.8, Q90-Q93.9, Q95-Q99.8, R95                                                                                                                                                                                                                                                                  |
| Congenital anomalies                              | 3     | 740-749.04, 749.2-758.9, 759.0-759.89                                                                                                                                                                                                                                                                                                             | P96.0, Q00-Q07.9, Q10.4-Q18.9, Q20-Q28.9, Q30-Q36, Q37-Q45.9, Q50-Q86, Q86.1-Q87.89, Q89-Q89.8, Q90-Q93.9, Q95-Q99.8                                                                                                                                                                                                                                                                                                                                                                                              |
| Neural tube defects                               | 4     | 740-741.93, 742.0                                                                                                                                                                                                                                                                                                                                 | Q00-Q01.9, Q05-Q05.9                                                                                                                                                                                                                                                                                                                                                                                                                                                                                              |
| Congenital heart anomalies                        | 4     | 745-747.9                                                                                                                                                                                                                                                                                                                                         | Q20-Q28.9                                                                                                                                                                                                                                                                                                                                                                                                                                                                                                         |
| Cleft lip and cleft palate                        | 4     | 749-749.04, 749.2-749.25                                                                                                                                                                                                                                                                                                                          | Q35-Q36, Q37-Q37.9                                                                                                                                                                                                                                                                                                                                                                                                                                                                                                |
| Down syndrome                                     | 4     | 758                                                                                                                                                                                                                                                                                                                                               | Q90-Q90.9                                                                                                                                                                                                                                                                                                                                                                                                                                                                                                         |
| Other chromosomal abnormalities                   | 4     | 758, 758.1-758.6, 758.8-758.9                                                                                                                                                                                                                                                                                                                     | Q91-Q93.9, Q95-Q95.9, Q97-Q97.9, Q99-Q99.8                                                                                                                                                                                                                                                                                                                                                                                                                                                                        |
| Other congenital anomalies                        | 4     | 742, 742.1-744.9, 748-748.9, 749.6-757.9, 759.0-759.89                                                                                                                                                                                                                                                                                            | P96.0, Q02-Q04.9, Q06-Q07.9, Q10.4-Q18.9, Q30-Q34.9, Q38-Q45.9, Q50-Q86, Q86.1-Q87.89, Q89-Q89.8                                                                                                                                                                                                                                                                                                                                                                                                                  |
| Skin and subcutaneous diseases                    | 3     | 035-035.9, 102-103.9, 133-133.6, 680-689, 694-695.3, 707-707.9                                                                                                                                                                                                                                                                                    | A46-A46.0, A66-A67.9, B86, D86.3, L00-L05.92, L08-L08.9, L10-L14.0, L51-L51.9, L88-L89.95, L97-L98.499                                                                                                                                                                                                                                                                                                                                                                                                            |
| Cellulitis                                        | 4     | 681-682.9                                                                                                                                                                                                                                                                                                                                         | L03-L03.91                                                                                                                                                                                                                                                                                                                                                                                                                                                                                                        |
| Pyoderma                                          | 4     | 035-035.9, 102-103.9, 680-680.9, 683-689                                                                                                                                                                                                                                                                                                          | A46-A46.0, A66-A67.9, L00-L02.93, L04-L05.92, L08-L08.9, L88, L97-L98.499                                                                                                                                                                                                                                                                                                                                                                                                                                         |
| Decubitus ulcer                                   | 4     | 707-707.9                                                                                                                                                                                                                                                                                                                                         | L89-L89.95                                                                                                                                                                                                                                                                                                                                                                                                                                                                                                        |
| Other skin and subcutaneous diseases              | 4     | 694-695.3                                                                                                                                                                                                                                                                                                                                         | D86.3, L10-L14.0, L51-L51.9                                                                                                                                                                                                                                                                                                                                                                                                                                                                                       |
| Sudden infant death syndrome                      | 3-4   | 798-798.0                                                                                                                                                                                                                                                                                                                                         | R95                                                                                                                                                                                                                                                                                                                                                                                                                                                                                                               |

**eTable 3: GBD cause list and associated ICD9 and ICD10 codes (continued).**

| Cause                       | Level | ICD9                                                                                                                                                                                                                                                                                                                                                                                                                                                                                                                                                                                              | ICD10                                                                                                                                                                                                                                                            |
|-----------------------------|-------|---------------------------------------------------------------------------------------------------------------------------------------------------------------------------------------------------------------------------------------------------------------------------------------------------------------------------------------------------------------------------------------------------------------------------------------------------------------------------------------------------------------------------------------------------------------------------------------------------|------------------------------------------------------------------------------------------------------------------------------------------------------------------------------------------------------------------------------------------------------------------|
| Injuries                    | 1     | E800-E800.3, E801-E801.3, E802-E802.3, E803-E803.3, E804-E804.3, E805-E805.3, E806-E806.3, E807-E807.3, E810.0-E810.7, E811.0-E811.7, E812.0-E812.7, E813.0-E813.7, E814.0-E814.7, E815.0-E815.7, E816.0-E816.7, E817.0-E817.7, E818.0-E818.7, E819.0-E819.7, E820.0-E820.7, E821.0-E821.7, E822.0-E822.7, E823.0-E823.7, E824.0-E824.7, E825.0-E825.7, E826.0-E826.4, E827.0-E827.4, E828.0-E828.4, E829.0-E829.4, E830-E838.9, E840-E849.9, E850.3-E850.89, E854.8, E856-E857.09, E860.2-E869.99, E870-E876.9, E878-E879.9, E880-E886.99, E888-E928.89, E929.1-E929.5, E930-E979.9, E990-E999.1 | V00-V86.99, V87.2-V87.3, V88.2-V88.3, V90-V98.8, W00-W46.2, W49-W62.9, W64-W70.9, W73-W75.9, W77-W81.9, W83-W94.9, W97.9, W99-X06.9, X08-X39.9, X46-X47, X47.1-X47.8, X48-X48.9, X50-X54.9, X57-X58.9, X60-Y08.9, Y35-Y84.9, Y87.0-Y87.1, Y88-Y88.3, Y89.0-Y89.1 |
| Transport injuries          | 2     | E800-E800.3, E801-E801.3, E802-E802.3, E803-E803.3, E804-E804.3, E805-E805.3, E806-E806.3, E807-E807.3, E810.0-E810.7, E811.0-E811.7, E812.0-E812.7, E813.0-E813.7, E814.0-E814.7, E815.0-E815.7, E816.0-E816.7, E817.0-E817.7, E818.0-E818.7, E819.0-E819.7, E820.0-E820.7, E821.0-E821.7, E822.0-E822.7, E823.0-E823.7, E824.0-E824.7, E825.0-E825.7, E826.0-E826.4, E827.0-E827.4, E828.0-E828.4, E829.0-E829.4, E830-E838.9, E840-E849.9, E929.1                                                                                                                                              | V00-V86.99, V87.2-V87.3, V88.2-V88.3, V90-V98.8                                                                                                                                                                                                                  |
| Road injuries               | 3     | E800.3, E801.3, E802.3, E803.3, E804.3, E805.3, E806.3, E807.3, E810.0-E810.6, E811.0-E811.7, E812.0-E812.7, E813.0-E813.7, E814.0-E814.7, E815.0-E815.7, E816.0-E816.7, E817.0-E817.7, E818.0-E818.7, E819.0-E819.7, E820.0-E820.6, E821.0-E821.6, E822.0-E822.7, E823.0-E823.7, E824.0-E824.7, E825.0-E825.7, E826.0-E826.1, E826.3-E826.4, E827.0, E827.3-E827.4, E828.0, E828.4, E829.0-E829.4                                                                                                                                                                                                | V01-V04.99, V06-V80.929, V82-V82.9, V87.2-V87.3                                                                                                                                                                                                                  |
| Pedestrian road injuries    | 4     | E811.7, E812.7, E813.7, E814.7, E815.7, E816.7, E817.7, E818.7, E819.7, E822.7, E823.7, E824.7, E825.7, E826.0, E827.0, E828.0, E829.0                                                                                                                                                                                                                                                                                                                                                                                                                                                            | V01-V04.99, V06-V09.9                                                                                                                                                                                                                                            |
| Cyclist road injuries       | 4     | E800.3, E801.3, E802.3, E803.3, E804.3, E805.3, E806.3, E807.3, E810.6, E811.6, E812.6, E813.6, E814.6, E815.6, E816.6, E817.6, E818.6, E819.6, E820.6, E821.6, E822.6, E823.6, E824.6, E825.6, E826.1                                                                                                                                                                                                                                                                                                                                                                                            | V10-V19.9                                                                                                                                                                                                                                                        |
| Motorcyclist road injuries  | 4     | E810.2-E810.3, E811.2-E811.3, E812.2-E812.3, E813.2-E813.3, E814.2-E814.3, E815.2-E815.3, E816.2-E816.3, E817.2-E817.3, E818.2-E818.3, E819.2-E819.3, E820.2-E820.3, E821.2-E821.3, E822.2-E822.3, E823.2-E823.3, E824.2-E824.3, E825.2-E825.3                                                                                                                                                                                                                                                                                                                                                    | V20-V29.9                                                                                                                                                                                                                                                        |
| Motor vehicle road injuries | 4     | E810.0-E810.1, E811.0-E811.1, E812.0-E812.1, E813.0-E813.1, E814.0-E814.1, E815.0-E815.1, E816.0-E816.1, E817.0-E817.1, E818.0-E818.1, E819.0-E819.1, E820.0-E820.1, E821.0-E821.1, E822.0-E822.1, E823.0-E823.1, E824.0-E824.1, E825.0-E825.1                                                                                                                                                                                                                                                                                                                                                    | V30-V79.9, V87.2-V87.3                                                                                                                                                                                                                                           |

**eTable 3: GBD cause list and associated ICD9 and ICD10 codes (continued).**

| Cause                                           | Level | ICD9                                                                                                                                                                                                                                                                                         | ICD10                                                                                                                                                                                   |
|-------------------------------------------------|-------|----------------------------------------------------------------------------------------------------------------------------------------------------------------------------------------------------------------------------------------------------------------------------------------------|-----------------------------------------------------------------------------------------------------------------------------------------------------------------------------------------|
| Other road injuries                             | 4     | E810.4-E810.5, E811.4-E811.5, E812.4-E812.5, E813.4-E813.5, E814.4-E814.5, E815.4-E815.5, E816.4-E816.5, E817.4-E817.5, E818.4-E818.5, E819.4-E819.5, E820.4-E820.5, E821.4-E821.5, E822.4-E822.5, E823.4-E823.5, E824.4-E824.5, E825.4-E825.5, E826.3-E826.4, E827.3-E827.4, E828.4, E829.4 | V80-V80.929, V82-V82.9                                                                                                                                                                  |
| Other transport injuries                        | 3-4   | E800-E800.2, E801-E801.2, E802-E802.2, E803-E803.2, E804-E804.2, E805-E805.2, E806-E806.2, E807-E807.2, E810.7, E820.7, E821.7, E826.2, E827.2, E828.2, E830-E838.9, E840-E849.9, E929.1                                                                                                     | V00-V00.898, V05-V05.99, V81-V81.9, V83-V86.99, V88.2-V88.3, V90-V98.8                                                                                                                  |
| Unintentional injuries                          | 2     | E850.3-E850.89, E854.8, E856-E857.09, E860.2-E869.99, E870-E876.9, E878-E879.9, E880-E886.99, E888-E906.99, E910-E928.89, E929.2-E929.5, E930-E949.9                                                                                                                                         | W00-W46.2, W49-W62.9, W64-W70.9, W73-W75.9, W77-W81.9, W83-W94.9, W97.9, W99-X06.9, X08-X32.9, X39-X39.9, X46-X47, X47.1-X47.8, X48-X48.9, X50-X54.9, X57-X58.9, Y38.9-Y84.9, Y88-Y88.3 |
| Falls                                           | 3-4   | E880-E886.99, E888-E888.9, E929.3                                                                                                                                                                                                                                                            | W00-W19.9                                                                                                                                                                               |
| Drowning                                        | 3-4   | E910-E910.99                                                                                                                                                                                                                                                                                 | W65-W70.9, W73-W74.9                                                                                                                                                                    |
| Fire, heat, and hot substances                  | 3-4   | E890-E899.09, E924-E924.99, E929.4                                                                                                                                                                                                                                                           | X00-X06.9, X08-X19.9                                                                                                                                                                    |
| Poisonings                                      | 3-4   | E850.3-E850.89, E854.8, E856-E857.09, E860.2-E869.99, E929.2                                                                                                                                                                                                                                 | X46-X47, X47.1-X47.8, X48-X48.9                                                                                                                                                         |
| Exposure to mechanical forces                   | 3     | E913-E913.19, E916-E922.99, E928.1-E928.7                                                                                                                                                                                                                                                    | W20-W38.9, W40-W43.9, W45.0-W45.2, W46-W46.2, W49-W52, W75-W75.9                                                                                                                        |
| Unintentional firearm injuries                  | 4     | E922-E922.99, E928.7                                                                                                                                                                                                                                                                         | W32-W34.9                                                                                                                                                                               |
| Unintentional suffocation                       | 4     | E913-E913.19                                                                                                                                                                                                                                                                                 | W75-W75.9                                                                                                                                                                               |
| Other exposure to mechanical forces             | 4     | E916-E921.99, E928.1-E928.6                                                                                                                                                                                                                                                                  | W20-W31.9, W35-W38.9, W40-W43.9, W45.0-W45.2, W46-W46.2, W49-W52                                                                                                                        |
| Adverse effects of medical treatment            | 3-4   | E870-E876.9, E878-E879.9, E930-E949.9                                                                                                                                                                                                                                                        | Y38.9-Y84.9, Y88-Y88.3                                                                                                                                                                  |
| Animal contact                                  | 3     | E905-E906.99                                                                                                                                                                                                                                                                                 | W52.0-W62.9, W64-W64.9, X20-X29.9                                                                                                                                                       |
| Venomous animal contact                         | 4     | E905-E905.99                                                                                                                                                                                                                                                                                 | X20-X29.9                                                                                                                                                                               |
| Non-venomous animal contact                     | 4     | E906-E906.99                                                                                                                                                                                                                                                                                 | W52.0-W62.9, W64-W64.9                                                                                                                                                                  |
| Foreign body                                    | 3     | E911-E912.09, E913.8-E915.09                                                                                                                                                                                                                                                                 | W44-W45, W45.3-W45.9, W78-W80.9, W83-W84.9                                                                                                                                              |
| Pulmonary aspiration and foreign body in airway | 4     | E911-E912.09, E913.8-E913.99                                                                                                                                                                                                                                                                 | W78-W80.9, W83-W84.9                                                                                                                                                                    |
| Foreign body in other body part                 | 4     | E914-E915.09                                                                                                                                                                                                                                                                                 | W44-W45, W45.3-W45.9                                                                                                                                                                    |
| Environmental heat and cold exposure            | 3-4   | E900-E902.99, E926-E926.99, E929.5                                                                                                                                                                                                                                                           | W88-W94.9, W97.9, W99-W99.9, X30-X32.9, X39-X39.9                                                                                                                                       |
| Other unintentional injuries                    | 3-4   | E903-E904.99, E913.2-E913.39, E923-E923.99, E925-E925.99, E927-E928.09, E928.8-E928.89                                                                                                                                                                                                       | W39-W39.9, W77-W77.9, W81-W81.9, W85-W87.9, X50-X54.9, X57-X58.9                                                                                                                        |
| Self-harm and interpersonal violence            | 2     | E950-E969                                                                                                                                                                                                                                                                                    | X60-Y08.9, Y87.0-Y87.1                                                                                                                                                                  |
| Self-harm                                       | 3-4   | E950-E959                                                                                                                                                                                                                                                                                    | X60-X84.9, Y87.0                                                                                                                                                                        |
| Interpersonal violence                          | 3     | E960-E969                                                                                                                                                                                                                                                                                    | X85-Y08.9, Y87.1                                                                                                                                                                        |
| Assault by firearm                              | 4     | E965-E965.4                                                                                                                                                                                                                                                                                  | X93-X94.0, X94.3-X94.7, X94.9-X95.9, X96.5                                                                                                                                              |
| Assault by sharp object                         | 4     | E966                                                                                                                                                                                                                                                                                         | X99-X99.9                                                                                                                                                                               |
| Assault by other means                          | 4     | E960-E964, E965.5-E965.9, E967-E969                                                                                                                                                                                                                                                          | X85-X92.9, X94.1-X94.2, X94.8, X96-X96.4, X96.6-X98.9, Y00-Y08.9, Y87.1                                                                                                                 |
| Forces of nature, war, and legal intervention   | 2     | E907-E909.9, E970-E979.9, E990-E999.1                                                                                                                                                                                                                                                        | X33-X38.9, Y35-Y38.893, Y89.0-Y89.1                                                                                                                                                     |
| Exposure to forces of nature                    | 3-4   | E907-E909.9                                                                                                                                                                                                                                                                                  | X33-X38.9                                                                                                                                                                               |
| Collective violence and legal intervention      | 3-4   | E970-E979.9, E990-E999.1                                                                                                                                                                                                                                                                     | Y35-Y38.893, Y89.0-Y89.1                                                                                                                                                                |

eTable 3: GBD cause list and associated ICD9 and ICD10 codes (continued).

| Cause        | Level | ICD9                                                                                                                                                                                                                                                                                                                                                                                                                                                                                                                                                                                                                                                                                                                                                                                                                                                                                                                                                                                                                                                                                                                                                                                                                                                                                                                                                                                                                                                                                                                                                                                                                                                                                                             | ICD10                                                                                                                                                                                                                                                                                                                                                                                                                                                                                                                                                                                                                                                                                                                                                                                                                                                                                                                                                                                                                                                                                                                                                                                                                                                                                                                                                                                                                                                                                                                                                         |
|--------------|-------|------------------------------------------------------------------------------------------------------------------------------------------------------------------------------------------------------------------------------------------------------------------------------------------------------------------------------------------------------------------------------------------------------------------------------------------------------------------------------------------------------------------------------------------------------------------------------------------------------------------------------------------------------------------------------------------------------------------------------------------------------------------------------------------------------------------------------------------------------------------------------------------------------------------------------------------------------------------------------------------------------------------------------------------------------------------------------------------------------------------------------------------------------------------------------------------------------------------------------------------------------------------------------------------------------------------------------------------------------------------------------------------------------------------------------------------------------------------------------------------------------------------------------------------------------------------------------------------------------------------------------------------------------------------------------------------------------------------|---------------------------------------------------------------------------------------------------------------------------------------------------------------------------------------------------------------------------------------------------------------------------------------------------------------------------------------------------------------------------------------------------------------------------------------------------------------------------------------------------------------------------------------------------------------------------------------------------------------------------------------------------------------------------------------------------------------------------------------------------------------------------------------------------------------------------------------------------------------------------------------------------------------------------------------------------------------------------------------------------------------------------------------------------------------------------------------------------------------------------------------------------------------------------------------------------------------------------------------------------------------------------------------------------------------------------------------------------------------------------------------------------------------------------------------------------------------------------------------------------------------------------------------------------------------|
| Garbage Code |       | 000-000.9, 002, 031-031.9, 038-038.9, 039.6, 040.0, 041.1-041.9, 067-069, 076-078.3, 078.8-078.9, 079.8-079.99, 084, 084.6, 085, 085.1-085.9, 089-089.9, 105-119, 125-125.3, 126-126.9, 127.2-127.9, 130-132.9, 133.8-134.9, 136.3-136.5, 136.8-136.9, 139.1-139.9, 149-149.9, 159-159.9, 165-169, 176-179.9, 183.9-184, 184.5, 184.9, 187, 187.9, 189, 189.9, 194.9-199.9, 209, 209.2-209.20, 209.29-209.30, 209.6-209.60, 209.62, 209.69-210, 211, 211.9-212, 212.9, 214-216.9, 221, 221.9-222, 222.9-223, 223.9, 229, 229.1, 229.9-230.0, 230.9-231, 231.8-231.9, 233, 233.3-233.30, 233.39, 233.6, 233.9-234, 234.9-235, 235.1-235.3, 235.5, 235.9-236, 236.3, 236.6, 236.9-236.90, 237.4, 238, 238.6-239.1, 239.5, 239.7-239.9, 244, 244.9, 247-249.91, 264-264.9, 274-274.9, 276.0-276.9, 277.3-277.39, 278, 279-280.0, 280.9-281, 285-285.9, 286.6, 289.8-289.9, 293-294.0, 296-302.9, 304, 304.9-304.93, 306-307.0, 307.2-307.50, 307.52-307.53, 307.59-320, 320.9, 324-327.19, 328-329, 331.3-331.4, 338-339.89, 342-344.9, 346-348.9, 349.81-353.5, 354-355.9, 357, 357.8-357.9, 360-376, 376.10-380.9, 384-389.9, 399-401.9, 405-409.4, 415-416.0, 416.2-416.9, 418-419.9, 423.0, 426-426.9, 427.4-427.5, 427.9-429, 429.2-429.9, 436-437, 437.3, 437.9-440.9, 444-445.89, 458-458.9, 459.0, 459.5-460.9, 462-464, 464.00, 464.1-464.10, 464.20, 464.3-464.30, 464.5-464.51, 465-465.9, 482.9-483, 484, 484.8-486.9, 505-505.9, 507-507.9, 510-514.9, 515.0-515.9, 518-518.53, 518.8-518.89, 519, 519.8-529.9, 536.2-536.3, 536.8-536.9, 537.7, 537.89-537.9, 544-549, 553.8-553.9, 559-559.0, 560.4-560.7, 561, 562.2-563, 564.8-564.9, 567-569, 569.49, 569.79-569.83, 569.86-570.9, 572-572.2, 573 | A01, A14.9, A29, A31-A31.9, A40-A45.9, A47-A48.0, A48.3, A48.8-A49.02, A49.2-A49.9, A59-A59.9, A61-A62, A64-A64.0, A71-A73, A74.0, A76, A97, A99-A99.0, B07-B09, B11-B14, B28-B29, B30-B32.4, B34-B46.9, B49-B49.9, B54-B55, B55.1-B55.9, B58-B59.9, B61-B62, B64, B68-B68.9, B73-B74.2, B76-B76.9, B78-B82.9, B83.9-B85.4, B87-B89, B93-B94.0, B94.8-B94.9, B95.6-B99.9, C14-C14.9, C26-C29, C35-C36, C39-C39.9, C42, C46-C46.9, C55-C55.9, C57.9, C59-C6, C63.9, C68, C68.9, C75.9-C80.9, C87, C97-D00.0, D01, D01.4-D02, D02.4-D02.9, D07, D07.3-D07.39, D07.6-D09, D09.1-D09.19, D09.7, D09.9-D10, D10.9, D13, D13.9-D14, D14.4, D17-D21.9, D28, D28.9-D29, D29.9-D30, D30.9, D36.0, D36.9-D37.0, D37.6-D38, D38.6-D39.0, D39.7, D39.9-D40, D40.9-D41, D41.9, D44, D44.9, D46-D46.9, D47.1, D48, D48.7-D49.1, D49.5, D49.7-D49.8, D49.89-D50.0, D50.9, D54, D59, D59.4, D59.8-D59.9, D62-D63.0, D63.8-D64, D64.1-D64.2, D64.8-D65.9, D68, D69.9, D75.9, D79-D85, D87-D88, D89.8-D99, E07.8-E08.9, E15, E16, E17-E19, E34.9-E35.8, E37-E39, E47-E50.9, E62, E64.1, E69, E85.3-E87.70, E87.79-E87.99, E90-E998, F04-F06.1, F06.3-F07.0, F07.2-F09.9, F17-F17.9, F30-F50, F50.8-G00, G00.9-G02.8, G03.9, G06-G09.9, G15-G19, G27-G29, G32-G34, G38-G39, G42-G44.89, G47-G47.29, G47.4-G60.9, G62-G69, G74-G89.4, G91-G93.6, G93.8-G94.8, G96-G96.9, G98-H05, H05.12-H69.93, H71-H99, I00.0, I03-I04, I10-I10.9, I14-I19, I26-I27.0, I27.2-I27.9, I28.9-I29.9, I31.2-I31.4, I44-I46.9, I49-I51, I51.6-I59, I62, I62.1-I62.9, I64-I64.9, I67, I67.4, I67.8-I68 |

eTable 3: GBD cause list and associated ICD9 and ICD10 codes (continued).

| Cause                    | Level | ICD9                                                                                                                                                                                                                                                                                                                                                                                                                                                                                                                                                                                                                                                                                                                                                                                                                                                                                                                                                                                                                                                         | ICD10                                                                                                                                                                                                                                                                                                                                                                                                                                                                                                                                                                                                                                                                                                                                                                                                                                                                                                                                                                                                                                                                                                                                                                                                                                                                                                                                                                                                                                                                                                                  |
|--------------------------|-------|--------------------------------------------------------------------------------------------------------------------------------------------------------------------------------------------------------------------------------------------------------------------------------------------------------------------------------------------------------------------------------------------------------------------------------------------------------------------------------------------------------------------------------------------------------------------------------------------------------------------------------------------------------------------------------------------------------------------------------------------------------------------------------------------------------------------------------------------------------------------------------------------------------------------------------------------------------------------------------------------------------------------------------------------------------------|------------------------------------------------------------------------------------------------------------------------------------------------------------------------------------------------------------------------------------------------------------------------------------------------------------------------------------------------------------------------------------------------------------------------------------------------------------------------------------------------------------------------------------------------------------------------------------------------------------------------------------------------------------------------------------------------------------------------------------------------------------------------------------------------------------------------------------------------------------------------------------------------------------------------------------------------------------------------------------------------------------------------------------------------------------------------------------------------------------------------------------------------------------------------------------------------------------------------------------------------------------------------------------------------------------------------------------------------------------------------------------------------------------------------------------------------------------------------------------------------------------------------|
| Garbage Code (continued) |       | 573.5, 578-578.9, 584-584.9, 586-587.9, 591-591.9, 593.9, 599.7-599.72, 599.9-600.91, 603-603.9, 605-608.1, 608.3-609, 611-612.1, 615-616.9, 619-619.9, 621-621.35, 622-622.2, 622.8-628.9, 629.89-629.9, 637-637.92, 639-639.9, 690-693.9, 695.8-706.9, 708-709.9, 712-713.8, 714.4, 715-716, 716.1-728.85, 728.87, 728.89-730.09, 730.2-730.39, 730.7-731.9, 733, 733.2-739.9, 749.1-749.14, 759, 759.9, 770.0, 779.9-780.56, 780.58, 780.6-780.61, 780.64-786.02, 786.04-787.04, 787.2-787.9, 787.99-788, 788.1-790.1, 790.29, 790.4-797.9, 798.1-E80, E800.8-E800.9, E801.8-E801.9, E802.8-E802.9, E803.8-E803.9, E804.8-E804.9, E805.8-E805.9, E806.8-E806.9, E807.8-E810, E810.8-E811, E811.8-E812, E812.8-E813, E813.8-E814, E814.8-E815, E815.8-E816, E816.8-E817, E817.8-E818, E818.8-E819, E819.8-E820, E820.8-E821, E821.8-E822, E822.8-E823, E823.8-E824, E824.8-E825, E825.8-E826, E826.8-E827, E827.8-E828, E828.8-E829, E829.8-E83, E839, E85, E855-E855.99, E858-E859, E87, E877, E88, E887-E887.09, E928.9-E929.0, E929.8-E929.9, E980-E989 | I68.8-I69, I69.4-I70.1, I70.8-I70.92, I74-I76, I90, I92-I95.1, I95.8-I96.9, I98.4-I98.8, I99-J00.0, J02, J02.8-J03, J03.8-J04, J04.1-J04.31, J05.1-J05.10, J06-J08, J15.9, J17-J19.6, J22-J29, J48-J59, J64-J64.9, J69-J69.9, J71-J81.9, J83, J85-J90.9, J93-J94.9, J96-K19, K30, K31.9-K34, K39, K47-K49, K53-K54, K63-K63.4, K63.8-K63.9, K65-K66.1, K66.9, K69, K71-K71.2, K71.6, K71.8-K72.01, K75-K75.1, K78-K79, K84, K87-K89, K92-K92.2, K92.9-K93, K93.1-K93.8, K96-K99, L06-L07, L09, L15-L50.9, L52-L87.9, L90-L92.9, L94-L96, L98.5-L99.8, M04, M10-M12.09, M12.2-M29, M37-M39, M43.2-M49, M49.2-M64, M65.1-M71, M71.2-M73, M73.8-M79.9, M83-M86.29, M86.5-M86.9, M87.2-M87.9, M89.1-M89.49, M90-M99.9, N09, N13-N13.9, N17-N17.9, N19-N19.9, N24, N32.1-N32.2, N32.8-N33.8, N35-N35.9, N37-N38, N39.3-N40.9, N42-N43.42, N44.1-N44.8, N46-N48.9, N50-N59, N61-N64.9, N66-N69, N78-N79, N82-N82.9, N84, N84.2-N86, N88-N95.9, N97-N97.9, O08-O08.9, O17-O19, O27, O37-O39, O49-O59, O78-O79, O93-O95.9, P06, P16-P18, P23, P23.5-P23.9, P30-P34.2, P37.3-P37.4, P40-P49, P62-P69, P73, P79, P82, P85-P89, P96.9-P99.9, Q08-Q10.3, Q19, Q29, Q36.0-Q36.9, Q46-Q49, Q88, Q89.9, Q94, Q99.9-R19.6, R19.8-R50.1, R50.8-R50.81, R50.84-R72.9, R74-R78, R78.6-R94.8, R95.0-T71.161, T71.163-U03, U05-U99, V87-V87.1, V87.4-V88.1, V88.4-V89.9, V99-V99.0, W47-W48, W63, W71-W72, W76-W76.9, W82, W95-W97, W98, X07, X40-X44.9, X47.0, X47.9, X49-X49.9, X55-X56, X59-X59.9, Y09-Y34.9, Y85-Y87, Y87.2, Y89, Y89.9 |
